# Supplementary material for: Modifications in the piperazine ring of nucleozin affect anti-influenza activity
Source: PubMed Central journal article supplement (PMC9916566; doi:10.1371/journal.pone.0277073), 2023-02-10
Supplement: pone.0277073.s001.pdf [file pone.0277073.s001.pdf]

# Modifications in the piperazine ring of nucleozin affect anti-influenza activity

Erick Correa-Padilla<sup>1,2</sup>, Alejandro Hernández-Cano<sup>1,3</sup>, Gabriel Cuevas<sup>1</sup>, Yunuen Acevedo-Betancur<sup>4</sup>, Fernando Esquivel-Guadarrama<sup>4</sup>, and Karina Martínez-Mayorga<sup>1,5,6,\*</sup>

<sup>1</sup> Institute of Chemistry, National Autonomous University of Mexico, Mexico City, Mexico.

<sup>2</sup> Zaragoza School of Higher Education, National Autonomous University of Mexico, Mexico City, Mexico

<sup>3</sup> School of Science, National Autonomous University of Mexico, Mexico City, Mexico.

<sup>4</sup> School of Medicine, Autonomous University of the State of Morelos, 62100 Cuernavaca, Morelos, México.

<sup>5</sup> Institute of Chemistry, Campus Merida, National Autonomous University of Mexico, Merida-Tetiz Highway, Km. 4.5, Ucu, Yucatán, México.

<sup>6</sup> Institute for Applied Mathematics, Merida Research Unit, National Autonomous University of Mexico, Sierra Papacal Merida, Yucatan, Mexico.

## Supporting information

**S1 Table.** Inhibitory activity data of the influenza A/WSN/33 (H1N1) virus with the McIP assay, reported by Cheng et al.

| Compound | IC <sub>50</sub><br>( $\mu$ M) | pIC <sub>50</sub> | SMILES                                                                        |
|----------|--------------------------------|-------------------|-------------------------------------------------------------------------------|
| Cheng 2a | 4.83                           | 5.316052869       | <chem>Clc1cc([N+](=O)[O-])ccc1N1CCN(CC1)C(=O)c1c(oc1C)-c1ccccc1</chem>        |
| Cheng 2b | 0.71                           | 6.148741651       | <chem>Clc1cc([N+](=O)[O-])ccc1N1CCN(CC1)C(=O)c1c(oc1C)-c1ccccc1OC</chem>      |
| Cheng 3a | 3.13                           | 5.504455662       | <chem>Clc1cc([N+](=O)[O-])ccc1N1CCN(CC1)C(=O)c1n(nnc1C)-c1ccccc1</chem>       |
| Cheng 3b | 0.68                           | 6.167491087       | <chem>Clc1cc([N+](=O)[O-])ccc1N1CCN(CC1)C(=O)c1n(nnc1C)-c1ccccc1OC</chem>     |
| Cheng 3c | 5.35                           | 5.271646218       | <chem>Clc1cc([N+](=O)[O-])ccc1N1CCN(CC1)C(=O)c1n(nnc1C)-c1cc(OC)ccc1</chem>   |
| Cheng 3d | 5.61                           | 5.251037139       | <chem>Clc1cc([N+](=O)[O-])ccc1N1CCN(CC1)C(=O)c1n(nnc1C)-c1ccc(OC)cc1</chem>   |
| Cheng 3e | 1.2                            | 5.920818754       | <chem>Clc1cc([N+](=O)[O-])ccc1N1CCN(CC1)C(=O)c1n(nnc1C)-c1ccccc1Cl</chem>     |
| Cheng 3f | 4.89                           | 5.310691141       | <chem>Clc1cc([N+](=O)[O-])ccc1N1CCN(CC1)C(=O)c1n(nnc1C)-c1cc(Cl)ccc1</chem>   |
| Cheng 3g | 4.93                           | 5.307153081       | <chem>Clc1cc([N+](=O)[O-])ccc1N1CCN(CC1)C(=O)c1n(nnc1C)-c1ccc(Cl)cc1</chem>   |
| Cheng 3h | 1.58                           | 5.801342913       | <chem>Clc1cc([N+](=O)[O-])ccc1N1CCN(CC1)C(=O)c1n(nnc1C)-c1ccccc1O</chem>      |
| Cheng 3i | 2.4                            | 5.619788758       | <chem>Clc1cc([N+](=O)[O-])ccc1N1CCN(CC1)C(=O)c1n(nnc1C)-c1ccccc1C</chem>      |
| Cheng 3j | 3.22                           | 5.492144128       | <chem>Clc1cc([N+](=O)[O-])ccc1N1CCN(CC1)C(=O)c1n(nnc1C)-c1ccccc1OCC</chem>    |
| Cheng 3k | 8.42                           | 5.074687909       | <chem>Clc1cc([N+](=O)[O-])ccc1N1CCN(CC1)C(=O)c1n(nnc1C)-c1ccccc1OC(C)C</chem> |

|           |       |             |                                                                         |
|-----------|-------|-------------|-------------------------------------------------------------------------|
| Cheng 3m  | 1.34  | 5.872895202 | Clc1cc([N+](=O)[O-])ccc1N1CCN(CC1)C(=O)c1n(nnc1C)-c1c(OC)cccc1OC        |
| Cheng 3n  | 8.36  | 5.077793723 | Clc1cc([N+](O)=O)ccc1N1CCN(CC1)C(=O)c1n(nnc1C)-c1cccc1OC                |
| Cheng 3p  | 48.12 | 4.317674381 | Clc1cccc1N1CCN(CC1)C(=O)c1n(nnc1C)-c1cccc1OC                            |
| Cheng 3q  | 16.98 | 4.770062314 | O(C)c1cccc1-n1nnc(C)c1C(=O)N1CCN(CC1)c1ccc([N+](=O)[O-])cc1             |
| Cheng 3t  | 35.45 | 4.45038376  | Clc1cc([N+](=O)[O-])ccc1N1CCN(CC1)C(=O)c1n(nnc1C)-c1cccc1OC             |
| Cheng 4a  | 3.38  | 5.4710833   | Clc1cc([N+](=O)[O-])ccc1N1CCN(CC1)C(=O)c1c(n[nH]c1C)-c1cccc1            |
| Cheng 4b  | 0.72  | 6.142667504 | Clc1cccc1-c1n[nH]c(C)c1C(=O)N1CCN(CC1)c1ccc([N+](=O)[O-])cc1Cl          |
| Cheng 5a  | 5.24  | 5.280668713 | Clc1cc([N+](=O)[O-])ccc1N1CCN(CC1)C(=O)c1cccc1-c1cccc1                  |
| Cheng 5b  | 1.57  | 5.804100348 | Clc1cc([N+](=O)[O-])ccc1N1CCN(CC1)C(=O)c1cccc1-c1cccc1OC                |
| Gerritz 3 | 0.04  | 7.397940009 | Clc1cc([N+](=O)[O-])ccc1N1CCN(CC1)C(=O)c1c(noc1C)-c1cccc1OC             |
| Gerritz 4 | 0.07  | 7.15490196  | Clc1cc([N+](=O)[O-])ccc1N1CCN(CC1)C(=O)c1c(noc1C)-c1cccnc1Cl            |
| Gerritz 5 | 0.07  | 7.15490196  | Clc1cc([N+](=O)[O-])ccc1N1CCN(CC1)C(=O)c1n(nnc1-c1cccc1OC)C             |
| Kao 1     | 0.05  | 7.301029996 | Clc1cc([N+](=O)[O-])ccc1N1CCN(CC1)C(=O)c1c(noc1C)-c1ccc(O)cc1           |
| Kao 10    | 25    | 4.602059991 | Clc1cccc1-c1noc(C)c1C(=O)N1CCN(CC1)c1c([N+](=O)[O-])cccc1Cl             |
| Kao 2     | 0.06  | 7.22184875  | Clc1cc([N+](=O)[O-])ccc1N1CCN(CC1)C(=O)c1c(noc1C)-c1cccc1               |
| Kao 3     | 0.056 | 7.251811973 | Clc1cc([N+](=O)[O-])ccc1N1CCN(CC1)C(=O)c1c(noc1C)-c1ccc(N)cc1           |
| Kao 4     | 0.25  | 6.602059991 | Clc1cc([N+](=O)[O-])ccc1N1CCN(CC1)C(=O)c1c(noc1C)-c1ccc(N=[N+]=[N-])cc1 |
| Kao 5     | 0.04  | 7.397940009 | Clc1cccc1-c1noc(C)c1C(=O)N1CCN(CC1)c1ccc([N+](=O)[O-])cc1Cl             |
| Kao 6 (R) | 0.21  | 6.677780705 | Clc1cccc1-c1noc(C)c1C(=O)N1CCN(CC1)C(=O)c1ccc([N+](=O)[O-])cc1Cl        |
| Kao 8     | 5.1   | 5.292429824 | Clc1cccc1-c1noc(C)c1C(=O)N1CCN(CC1)c1ccc([N+](=O)[O-])cc1               |
| Kao 9     | 12    | 4.920818754 | Clc1cccc1-c1noc(C)c1C(=O)N1CCN(CC1)c1ccc([N+](=O)[O-])cc1               |
| Liao 10   | 19.52 | 4.709520187 | Clc1cc([N+](=O)[O-])ccc1N1CCN(CC1)C(=O)c1cccc1                          |
| Liao 11   | 5.2   | 5.283996656 | Clc1cc([N+](=O)[O-])ccc1N1CCN(CC1)C(=O)c1cccc1C                         |
| Liao 12   | 14.96 | 4.825068406 | Clc1cc([N+](=O)[O-])ccc1N1CCN(CC1)C(=O)c1ccc(ccl)C                      |

|         |       |             |                                                                |
|---------|-------|-------------|----------------------------------------------------------------|
| Liao 13 | 5.87  | 5.231361899 | Clc1cc([N+](=O)[O-])ccc1N1CCN(CC1)C(=O)c1ccc(cc1)C             |
| Liao 14 | 4.93  | 5.307153081 | Clc1cccc1C(=O)N1CCN(CC1)c1ccc([N+](=O)[O-])cc1Cl               |
| Liao 15 | 11.14 | 4.953114809 | Clc1cc([N+](=O)[O-])ccc1N1CCN(CC1)C(=O)c1cc(Cl)ccc1            |
| Liao 16 | 7.66  | 5.11577123  | Clc1cc([N+](=O)[O-])ccc1N1CCN(CC1)C(=O)c1ccc(Cl)cc1            |
| Liao 17 | 4.24  | 5.372634143 | Brc1cccc1C(=O)N1CCN(CC1)c1ccc([N+](=O)[O-])cc1Cl               |
| Liao 18 | 11.28 | 4.9476909   | Brc1cc(ccc1)C(=O)N1CCN(CC1)c1ccc([N+](=O)[O-])cc1Cl            |
| Liao 19 | 7.85  | 5.105130343 | Brc1ccc(cc1)C(=O)N1CCN(CC1)c1ccc([N+](=O)[O-])cc1Cl            |
| Liao 20 | 6.2   | 5.207608311 | Clc1cc([N+](=O)[O-])ccc1N1CCN(CC1)C(=O)c1cccc1[N+](=O)[O-]     |
| Liao 21 | 27.19 | 4.565590792 | Clc1cc([N+](=O)[O-])ccc1N1CCN(CC1)C(=O)c1cc([N+](=O)[O-])ccc1  |
| Liao 22 | 3.01  | 5.521433504 | Clc1cc([N+](=O)[O-])ccc1N1CCN(CC1)C(=O)c1ccc([N+](=O)[O-])cc1  |
| Liao 23 | 4.72  | 5.326058001 | Clc1cc([N+](=O)[O-])ccc1N1CCN(CC1)C(=O)c1cccc1O                |
| Liao 24 | 12.84 | 4.891434976 | Clc1cc([N+](=O)[O-])ccc1N1CCN(CC1)C(=O)c1cccc1N                |
| Liao 25 | 9.69  | 5.013676223 | Clc1cc([N+](=O)[O-])ccc1N1CCN(CC1)C(=O)c1cccc1CC               |
| Liao 26 | 11.55 | 4.937418016 | Clc1cc([N+](=O)[O-])ccc1N1CCN(CC1)C(=O)c1cccc1C1CCCC1          |
| Liao 27 | 6.16  | 5.210419288 | Clc1cc([N+](=O)[O-])ccc1N1CCN(CC1)C(=O)c1cccc1OC               |
| Liao 28 | 3.5   | 5.455931956 | Clc1cc([N+](=O)[O-])ccc1N1CCN(CC1)C(=O)c1ccc(cc1)C#N           |
| Liao 29 | 66.03 | 4.180258703 | Clc1cc([N+](=O)[O-])ccc1N1CCN(CC1)C(=O)c1ccc(cc1)C(OC)=O       |
| Liao 30 | 0.65  | 6.187086643 | Clc1cc([N+](=O)[O-])ccc1N1CCN(CC1)C(=O)c1c(cccc1N)C            |
| Liao 31 | 3.28  | 5.484126156 | Clc1cc([N+](=O)[O-])ccc1N1CCN(CC1)C(=O)c1c(cccc1[N+](=O)[O-])C |
| Liao 32 | 1.07  | 5.970616222 | Brc1cccc(C)c1C(=O)N1CCN(CC1)c1ccc([N+](=O)[O-])cc1Cl           |
| Liao 33 | 0.52  | 6.283996656 | Clc1cccc(C)c1C(=O)N1CCN(CC1)c1ccc([N+](=O)[O-])cc1Cl           |
| Liao 34 | 4.88  | 5.311580178 | Clc1cc([N+](=O)[O-])ccc1N1CCN(CC1)C(=O)c1c(cccc1C)C            |
| Liao 35 | 2.11  | 5.675717545 | Clc1cc([N+](=O)[O-])ccc1N1CCN(CC1)C(=O)c1ccc([N+](=O)[O-])cc1C |
| Liao 36 | 2.9   | 5.537602002 | Brc1cc(C)c(cc1)C(=O)N1CCN(CC1)c1ccc([N+](=O)[O-])cc1Cl         |

|             |      |             |                                                                                  |
|-------------|------|-------------|----------------------------------------------------------------------------------|
| Liao 37     | 1.23 | 5.910094889 | <chem>Brc1cc([N+](=O)[O-])ccc1C(=O)N1CCN(CC1)c1ccc([N+](=O)[O-])cc1Cl</chem>     |
| Liao 38     | 5.33 | 5.273272791 | <chem>Brc1cc(F)c(cc1)C(=O)N1CCN(CC1)c1ccc([N+](=O)[O-])cc1Cl</chem>              |
| Lia0 39     | 0.27 | 6.568636236 | <chem>Clc1cc(cc(C)c1C(=O)N1CCN(CC1)c1ccc([N+](=O)[O-])cc1Cl)C#N</chem>           |
| Nucleozin   | 0.06 | 7.22184875  | <chem>Clc1cc([N+](=O)[O-])ccc1N1CCN(CC1)C(=O)c1c(noc1C)-c1ccccc1</chem>          |
| Su 1 (3061) | 0.07 | 7.15490196  | <chem>Clc1ccccc1-c1noc(C)c1C(=O)N1CCN(CC1)c1ccc([N+](=O)[O-])cc1Cl</chem>        |
| Su 10 9168  | 19.5 | 4.709965389 | <chem>Clc1ccc([N+](=O)[O-])c1N1CCN(CC1)C(=O)c1c(noc1C)-c1ccccc1</chem>           |
| Su 2 4332   | 1.3  | 5.886056648 | <chem>Clc1cc([N+](=O)[O-])ccc1N1CC(N(CC1)C(=O)c1c(noc1C)-c1ccccc1)C</chem>       |
| Su 3 2130   | 3.5  | 5.455931956 | <chem>Clc1ccccc1-c1noc(C)c1C(=O)N1CCN(CC1)c1ccc(Cl)cc1[N+](=O)[O-]</chem>        |
| Su 4 (3822) | 1.2  | 5.920818754 | <chem>o1nc(-c2ccccc2OC)c(C(=O)N2CCN(CC2)c2ccc([N+](=O)[O-])cc2)c1C</chem>        |
| Su 5 6074   | 5    | 5.301029996 | <chem>Clc1cccc(Cl)c1-c1noc(C)c1C(=O)N1CCN(CC1)c1ccc([N+](=O)[O-])cc1</chem>      |
| Su 6 0927   | 14   | 4.853871964 | <chem>Clc1ccccc1-c1noc(C)c1C(=O)N1CCN(CC1)c1c([N+](=O)[O-])cccc1Cl</chem>        |
| Su 7 0131   | 17.5 | 4.756961951 | <chem>Clc1ccccc1-c1noc(C)c1C(=O)N1CCN(CC1)c1cc(N2CCCC2)c([N+](=O)[O-])cc1</chem> |
| Su 9 4427   | 21   | 4.677780705 | <chem>Clc1ccccc1-c1noc(C)c1C(=O)N1CCN(CC1)c1ccc([N+](=O)[O-])cc1</chem>          |

**S2 Table.** Evaluation of base estimators.

| Model | Base estimator            | r <sup>2</sup> | q <sup>2</sup> <sub>cv</sub> |
|-------|---------------------------|----------------|------------------------------|
| 1     | RandomForest              | 0.4568         | 0.4047                       |
| 2     | LinearRegression          | 0.6625         | 0.3058                       |
| 3     | Ridge                     | 0.6773         | 0.3097                       |
| 4     | Lasso                     | ---            | ---                          |
| 5     | ElasticNet                | 0.9248         | ----                         |
| 6     | ElasticNetCV              | 0.941          | 0.2496                       |
| 7     | BayesianRidge             | 0.6648         | 0.3083                       |
| 8     | SGDRegressor              | 0.9241         | 0.0657                       |
| 9     | KNearestNeighborRegressor | ---            | ----                         |
| 10    | DesicionTree              | 0.9543         | ----                         |
| 11    | MLPregressor              | ---            | ----                         |

**S3 Table.** Hyperparameter tuning for RandomForest regressor in the SelectFromModel algorithm.

| Model | Hyperparameter   | $r^2$    |
|-------|------------------|----------|
|       | Number of trees  |          |
| 1     | 50               | 0.889726 |
| 2     | 100              | 0.889627 |
| 3     | 200              | 0.892266 |
| 4     | 300              | 0.911922 |
| 5     | 400              | 0.884414 |
| 6     | 500              | 0.908299 |
| 7     | 600              | 0.894403 |
| 8     | 700              | 0.895586 |
| 9     | 800              | 0.907335 |
| 10    | 900              | 0.896408 |
| 11    | 1000             | 0.907692 |
| 12    | 1500             | 0.47191  |
| 13    | 2000             | 0.906627 |
| 14    | 3000             | 0.903815 |
| 15    | 5000             | 0.889724 |
|       | max_depth        |          |
| 19    | 1                | 0.914554 |
| 20    | 5                | 0.899148 |
| 21    | 10               | 0.906564 |
| 22    | 20               | 0.907206 |
| 23    | 50               | 0.90605  |
| 24    | 60               | 0.89697  |
| 25    | 70               | 0.90496  |
| 26    | 100              | 0.90612  |
| 27    | 150              | 0.8876   |
|       | min_samples_leaf |          |

|    |    |          |
|----|----|----------|
| 43 | 2  | 0.905306 |
| 44 | 3  | 0.897723 |
| 45 | 4  | 0.909282 |
| 46 | 5  | 0.90568  |
| 47 | 6  | 0.908785 |
| 48 | 7  | 0.909276 |
| 49 | 8  | 0.899425 |
| 50 | 9  | 0.911808 |
| 51 | 10 | 0.902544 |
| 52 | 11 | 0.910523 |
| 53 | 15 | 0.859015 |
| 54 | 20 | 0.679566 |

min\_impurity\_decrease

|    |         |          |
|----|---------|----------|
| 80 | 1.0E-15 | 0.896716 |
| 81 | 1.0E-12 | 0.880198 |
| 82 | 1.0E-9  | 0.891953 |
| 83 | 1.0E-6  | 0.891708 |
| 84 | 1.0 E-3 | 0.904586 |
| 85 | 1.0 E-2 | 0.895698 |
| 86 | 1.0 E-1 | 0.917172 |
| 87 | 1.0     | 0.679566 |
| 88 | 2.0     | 0.679566 |

warm\_start

|    |                 |          |
|----|-----------------|----------|
| 89 | False (default) | 0.911189 |
| 90 | True            | 0.891056 |

---

**S4 Table.** Search of the maximum number of features.

| Model | max features  | $r^2$    | $q^2_{cv}$ |
|-------|---------------|----------|------------|
| 1     | 257 (default) | 0.907362 | 0.475546   |
| 2     | 600           | 0.907362 | 0.475546   |
| 3     | 300           | 0.907362 | 0.475546   |
| 4     | 250           | 0.907142 | 0.475546   |
| 5     | 200           | 0.916146 | 0.471066   |
| 6     | 150           | 0.909878 | 0.483206   |
| 7     | 100           | 0.915111 | 0.509704   |
| 8     | 90            | 0.91515  | 0.513279   |
| 9     | 80            | 0.917171 | 0.499364   |
| 10    | 70            | 0.918393 | 0.494183   |
| 11    | 60            | 0.918495 | 0.51263    |
| 12    | 50            | 0.912338 | 0.493      |
| 13    | 40            | 0.901462 | 0.377326   |
| 14    | 30            | 0.913563 | 0.370986   |
| 15    | 20            | 0.900508 | 0.357616   |

**S5 Table.** Search of relevant Principal Components.

| Model | #PCA | $r^2$  | $q^2_{cv}$ |
|-------|------|--------|------------|
| 1     | 40   | 0.9386 | 0.4863     |
| 2     | 30   | 0.9276 | 0.4823     |
| 3     | 20   | 0.9073 | 0.4755     |
| 4     | 19   | 0.9055 | 0.4766     |
| 5     | 18   | 0.9036 | 0.4643     |
| 6     | 17   | 0.9026 | 0.4658     |
| 7     | 16   | 0.8975 | 0.4558     |
| 8     | 15   | 0.8950 | 0.4497     |
| 9     | 14   | 0.8914 | 0.4333     |
| 10    | 13   | 0.8919 | 0.4285     |
| 11    | 12   | 0.8919 | 0.4213     |
| 12    | 11   | 0.8856 | 0.4160     |
| 13    | 10   | 0.8609 | 0.3741     |
| 14    | 9    | 0.8018 | 0.3236     |
| 15    | 5    | 0.6663 | 0.1834     |

## Experimental procedure

*Reagents and chemicals:* The chemicals and solvents were purchased from Sigma-Aldrich or from other commercial suppliers. The chemicals were used without further purification and the solvents were distilled prior use. Melting points were determined in open capillaries in a KRUSS melting points apparatus and in a Fischer-Jones melting point apparatus and are uncorrected. Reaction progresses were monitored by thin layer chromatography (TLC) using silica gel 60 F254 plates (Merck, A.G. Germany). Shortwave UV light (254 nm) and/or staining with iodine and ninhydrin solution, were used to monitor the reactions. Flash chromatography on silica gel technical grade (Merck, 230-400 mesh) was used to purify compounds and intermediates.  $^1\text{H}$  and  $^{13}\text{C}$ -NMR spectra were obtained either in a Bruker Avance 300 MHz, a Bruker Avance III 400 MHz, or a Bruker Ascend 500 MHz, using  $\text{CDCl}_3$  or  $\text{DMSO-d}_6$  as solvents. Data for  $^1\text{H}$ -NMR is referenced to the solvent ( $\text{CDCl}_3 = \delta 7.26$  for  $^1\text{H}$ ,  $\delta 77.1$  for  $^{13}\text{C}$ ;  $\text{DMSO-d}_6 = \delta 3.3$  for  $^1\text{H}$  (residual  $\text{H}_2\text{O}$ ),  $\delta 40.14$  for  $^{13}\text{C}$ ). Low-resolution DART+ mass spectra were obtained on a Jeol JMS-T100LC spectrometer. Low-resolution Electronic Impact mass spectrum was obtained on a Jeol, SX 102 A spectrometer and values of the signals are expressed in mass/charge units ( $m/z$ ), followed by the relative intensity with reference to a 100% base peak.

### Synthesis of compounds **15**, **20** and **21**.

In a 25 mL round-bottom flask were mixed (4.69 mmol) of *N*-Boc monoprotected amine (**14** and **19**) with 4.69 mmol of the corresponding 4-nitro-fluorophenyl compound, and 1.5 g of  $\text{K}_2\text{CO}_3$  (10.85 mmol) and 10 mL of DMF; the mixture was heated at 120 °C with magnetic stirring overnight and the end of the reaction was confirmed by TLC. DMF was eliminated on a rotary evaporator, and then 15 mL of DCM were added, the organic phase was washed twice with 20 mL of water and once with 20 mL of brine, dried over anhydrous  $\text{Na}_2\text{SO}_4$ , filtered and evaporated to dryness. It was recrystallized from 20 parts of AcOEt.

### Solid-state synthesis of compound **20**.

The monoprotected diamine **19** (50mg, 0.025 mmol) and the compound **13** (44mg, 0.25mmol), both in solid state, were grinded in a mortar with a pestle for 15 minutes, with five equivalents of  $\text{K}_2\text{CO}_3$  (172mg, 1.25 mmol) as base. The reaction was monitored by TLC, 3 mL of hot AcOEt were added to the reaction medium, stirred for a minute, filtered through celite and recrystallized. The mother liquor was removed through decantation and then by suction with a Pasteur pipette, 11 mg of a yellow solid was obtained with a melting point of 200°C.

Compound **20**: m.p. 199.7 °C;  $^1\text{H}$ -NMR (500 MHz,  $\text{CDCl}_3$ ):  $\delta$  8.17 (d,  $J = 2.0$  Hz, 1H), 7.98 (d,  $J = 9.0$  Hz, 1H), 6.64 (d,  $J = 8.8$  Hz, 1H), 4.78 (d,  $J = 40.79$  Hz, 1H), 4.59 (d,  $J = 69.61$  Hz, 1H), 4.01 (dd,  $J = 23.0, 9.2$  Hz, 1H), 3.61 (dd,  $J = 44.0, 9.9$  Hz, 1H), 3.45 (m, 2H), 1.99 (d,  $J = 11.5$  Hz, 2H), 1.44 (d,  $J = 12.2$  Hz, 9H).  $^{13}\text{C}$ -NMR (125 MHz,  $\text{CDCl}_3$ ):  $\delta$  154.13 (d, 5.22 Hz), 149.54, 138.50 (d,  $J = 13.71$  Hz), 128.37, 123.72, 118.61 (d,  $J = 12.89$  Hz), 114.33 (d,  $J = 27.29$  Hz), 80.15 (d,  $J = 11.54$  Hz), 60.39 (d,  $J = 72.59$  Hz, CH), 59.85 (d,  $J = 41.37$  Hz,  $\text{CH}_2$ ), 56.52 (d,  $J = 130.03$  Hz, CH), 52.19 (d,  $J = 85.19$  Hz,  $\text{CH}_2$ ), 37.13 (d,  $J = 45.38$  Hz,  $\text{CH}_2$ ), 28.44. **EI-MS** (70eV)  $m/z$  (% intensity): 353 ( $\text{M}^+$ ,10), 337 (<5), 280 (22), 252 (20), 252 (18), 223 (56), 183 (12).



Compound **21**: m.p. 200.3 °C; <sup>1</sup>H-NMR (500 MHz, CDCl<sub>3</sub>): δ 8.11 (d, *J* = 8.8 Hz, 2H), 6.49 (d, *J* = 8.8 Hz, 2H), 4.64 (d, *J* = 65.8 Hz, 1H), 4.53 (s, 1H), 3.59 (d, *J* = 8.8 Hz, 1H), 3.49 – 3.24 (m, 3H), 2.00 (m, 2H), 1.44 (d, *J* = 24.2 Hz, 9H). <sup>13</sup>C-NMR (125 MHz, CDCl<sub>3</sub>): δ 152.97, 150.03, 136.42, 125.38 (2C), 109.64 (2C), 79.12 (d, *J* = 10.0 Hz), 56.60 (d, *J* = 63.41 Hz, CH), 55.71 (d, *J* = 27.93 Hz, CH<sub>2</sub>), 55.33 (d, *J* = 118.9 Hz, CH), 51.06 (d, *J* = 50.43 Hz, CH<sub>2</sub>), 36.47 (d, *J* = 58.28 Hz, CH<sub>2</sub>), 27.37 (*J* = 10.50 Hz).

## Synthesis of compounds 16, 22, 22 and 25.

In a 50 mL round-bottom flask, 2.3 mmol of the monoprotected *N*-Boc-*N'*-(4-nitroaryl) amine (compounds **15**, **20**, **21**) were dissolved in 10 mL of DCM, and then 840 μL of MeSO<sub>3</sub>H were added slowly. The reaction, monitored by TLC, was completed in 5 minutes. Saturated Na<sub>2</sub>CO<sub>3</sub> solution was added to pH > 8, extracted with DCM (2 X 10 mL), dried over anhydrous Na<sub>2</sub>SO<sub>4</sub> and evaporated to dryness.

Compound **22**: m.p. 154.5 °C; RMN <sup>1</sup>H (500 MHz, CDCl<sub>3</sub>) δ 8.19 (d, *J* = 2.5 Hz, 1H), 7.98 (dd, *J* = 9.3, 2.5 Hz, 1H), 6.63 (d, *J* = 9.3 Hz, 1H), 4.66 (s, 1H), 4.09 (dd, *J* = 9.7, 1.6 Hz, 1H), 3.83 (s, 1H), 3.35 – 3.21 (m, 2H), 3.16 (d, *J* = 10.1 Hz, 1H), 1.96 (d, *J* = 9.9 Hz, 1H), 1.89 (d, *J* = 9.9 Hz, 1H), 1.55 (s, 1H, NH). RMN <sup>13</sup>C (125 MHz, CDCl<sub>3</sub>) δ 148.62 (0.5 C), 144.92 (0.5 C), 142.81 (0.5 C), 137.08 (0.5 C), 127.36, 122.62, 117.52, 113.27, 61.64 (CH<sub>2</sub>), 59.25 (CH), 55.27 (CH), 49.74 (CH<sub>2</sub>), 36.16 (CH<sub>2</sub>).

Compound **23**: m.p. 150.4 °C <sup>1</sup>H-NMR (500 MHz, CDCl<sub>3</sub>) δ 8.06 (d, *J* = 9.1 Hz, 2H), 6.44 (d, *J* = 9.0 Hz, 2H), 4.43 (s, 1H), 3.87 (s, 1H), 3.62 (d, *J* = 9.16 Hz, 1H), 3.11 (t, *J* = 9.56 Hz, 2H), 3.03 (d, *J* = 9.9 Hz, 1H), 1.94 (d, *J* = 9.80 Hz, 1H), 1.88 (d, *J* = 9.8 Hz, 1H), 1.59 (br, 1H). RMN <sup>13</sup>C (125 MHz, CDCl<sub>3</sub>) δ 146.47, 132.06, 121.61 (2C), 105.76 (2C), 54.59 (CH<sub>2</sub>), 52.90 (CH), 51.38 (CH), 46.12 (CH<sub>2</sub>), 32.85 (CH<sub>2</sub>).

## Synthesis of nlz, 9 and 10.

In a 25 mL ball flask, 240 mg (1.2 mmol) of compound **17** were placed with 5 mL of dry DCM and 350 mL of TEA were added, cooled between 0 and 5 °C, 154 mL of PivCl were added and stirred for 30 min. It was confirmed by TLC that all the carboxylic acid **17** reacted and then 1.2 mmol of the corresponding amine was added in solid state and stirred for 30 minutes. Then, 5 mL of water were added and stirred for a few minutes, the phases were separated and extracted with 5 mL of DCM, the organic phase was washed with 10 mL of water, dried over anhydrous Na<sub>2</sub>SO<sub>4</sub>, evaporated to dryness, and recrystallized from ethyl acetate, obtaining 1.3 g of a yellow solid with a melting point of 174.5 °C, 25% yield.

**Nucleozin (nlz)**: m.p. 174.5 °C; <sup>1</sup>H-RMN (300 MHz, CDCl<sub>3</sub>) δ 8.21 (d, *J* = 2.6 Hz, 1H), 8.05 (dd, *J* = 8.9, 2.6 Hz, 1H), 7.70 – 7.62 (m, 2H), 7.52 – 7.45 (m, 3H), 6.84 (d, *J* = 8.9 Hz, 1H), 3.92 (m, 2H), 3.28 (m, 2H), 3.12 (m, 2H), 2.54 (m, 5H). <sup>13</sup>C-NMR (75 MHz, CDCl<sub>3</sub>) δ 169.98, 162.56, 159.96, 153.90, 142.79, 130.38, 129.10 (2C), 128.36, 128.00, 127.86 (2C), 126.54, 123.38, 119.55, 110.94, 50.14 (2C), 46.87, 41.85, 11.83. LRMS (DART+) *m/z* (% intensity): 429 (35, M<sup>+</sup>+2), 427 (100, M<sup>+</sup>), 226 (17).

Compound **9**: m.p. 174.5 °C; <sup>1</sup>H-NMR (500 MHz, CDCl<sub>3</sub>) δ 8.14 (dd, *J* = 17.7, 2.3 Hz, 1H), 7.90 (ddd, *J* = 72.9, 9.2, 2.2 Hz, 1H), 7.63-7.06 (m, 5H), 6.42 (dd, *J* = 130.4, 9.2 Hz, 1H), 5.15 (s, 1H), 4.63 (d, *J* = 86.1 Hz, 1H), 4.07 (m, 1H),

3.82 - 3.42 (m, 2H), 3.11 (dd,  $J = 39.3, 9.8$  Hz, 1H), 2.53 (d,  $J = 19.9$  Hz, 3H), 1.95 (dd,  $J = 89.13, 10.23$  Hz, 1H), 1.70 (dd,  $J = 108.57, 9.98$  Hz, 1H).  $^{13}\text{C-NMR}$  (125 MHz,  $\text{CDCl}_3$ )  $\delta$  170.04 (d,  $J = 42.24$  Hz), 161.57 (d,  $J = 88.36$  Hz), 159.67 (d,  $J = 38.84$  Hz), 148.97 (d,  $J = 24.56$  Hz), 138.92 (d,  $J = 29.21$  Hz), 130.30 (d,  $J = 67.75$  Hz), 128.91 (d,  $J = 56.21$  Hz), 128.22 (d,  $J = 13.37$  Hz, 2C), 127.92 (d,  $J = 51.08$  Hz), 126.83 (2C), 123.54 (d,  $J = 7.65$  Hz), 118.93 (d,  $J = 58.13$  Hz), 114.23 (d,  $J = 67.58$  Hz), 111.65 (d,  $J = 46.35$  Hz), 59.49 (m, CH), 59.01 (d,  $J = 20.47$  Hz,  $\text{CH}_2$ ), 55.63, 52.29 (d,  $J = 190.98$  Hz,  $\text{CH}_2$ ), 36.77 (d,  $J = 137.43$  Hz,  $\text{CH}_2$ ), 11.81. **LRMS** (DART+)  $m/z$  (% intensity): 441 (35,  $\text{M}^{+2}$ ), 439 (100,  $\text{M}^+$ ).

Compound **10**: m.p. 196.2 °C;  $^1\text{H-NMR}$  (500 MHz,  $\text{CDCl}_3$ ):  $\delta$  7.98 (dd,  $J = 23.7, 9.0$  Hz, 1H), 7.56 (d,  $J = 7.56$  Hz, 1H) 7.49 – 7.27 (m, 3H), 7.10 (dt,  $J = 38.5, 7.4$  Hz, 2H), 6.21 (d,  $J = 8.9$  Hz, 1H), 5.11 (s, 0.5H), 4.48 (s, 0.5H), 4.26 (s, 0.5 H), 4.01 (s, 0.5 H) – 3.90 (m, 1H), 3.63 – 2.05 (m, 4H), 2.43 (d,  $J = 35.6$  Hz, 3H), 2.00– 1.70 (m, 2H).  $^{13}\text{C-NMR}$  (125 MHz,  $\text{CDCl}_3$ ):  $\delta$  170.10, 161.72 (d,  $J = 98.99$  Hz), 159.64 (d,  $J = 29.54$  Hz), 150.52 (d,  $J = 4.87$  Hz), 137.89 (d,  $J = 7.10$  Hz), 130.26 (d,  $J = 44.27$  Hz), 129.03 (d,  $J = 56.06$  Hz, 2C), 128.29 (d,  $J = 20.26$  Hz), 127.28 (d,  $J = 118.39$  Hz, 2C), 126.21 (d,  $J = 6.80$  Hz, 2C), 111.68 (d,  $J = 53.35$  Hz), 110.75 (d,  $J = 14.77$  Hz, 2C), 58.26 (d,  $J = 259.03$  Hz, CH), 56.24 (d,  $J = 114.39$  Hz, CH), 56.04 (d,  $J = 47$  Hz,  $\text{CH}_2$ ), 52.3 (d,  $J = 151.49$  Hz,  $\text{CH}_2$ ), 37.25 ( $J = 142.31$  Hz,  $\text{CH}_2$ ), 11.80. **LREI-MS** (70eV)  $m/z$  (% intensity): 404 ( $\text{M}^+, 8$ ), 216 (35), 189 (22), 144 (30), 56 (22), 43 (20).

## Synthesis of compound 24.

In a 250 mL round-bottom flask, 6 mL of ethylenediamine were dissolved in 60 mL of dry DCM under nitrogen atmosphere and a solution of  $\text{Boc}_2\text{O}$  in 60 mL of DCM were added slowly with a syringe. The reaction was monitored by TLC. At the end of reaction, the organic phase was washed with 60 mL of water twice once with brine, dried over  $\text{Na}_2\text{SO}_4$  and filtered, the DCM was evaporated in a rotatory evaporator and the product was purified by column chromatography.

## Synthesis of compound 25.

In a 50 mL round-bottom flask, 647 mg of the compound **17** were placed, along with 2 drops of dry DMF and placed under nitrogen atmosphere, 10 mL of dry DCM were added, the reaction mixture was cold in an ice bath and 350  $\mu\text{L}$  of oxalyl chloride were added slowly and then left under stirring for 20 minutes. Separately, a solution of 10 mL of DCM with 577  $\mu\text{L}$  of TEA and 510 mg of the compound **24** were prepared, and was added slowly to the reaction mixture and stirred for 30 minutes. 20 mL of water were added next, the phases were separated, and the organic phase was washed once with 20 mL of  $\text{Na}_2\text{CO}_3$  solution, once more with water, and once with brine. The organic phase was dried over  $\text{Na}_2\text{SO}_4$ , filtered and the DCM was evaporated in a rotatory evaporator. The compound was purified by column chromatography (Hexane: AcOEt, 6:4).

Compound **25**: m.p. 160-161 °C;  $^1\text{H-NMR}$  (400 MHz,  $\text{DMSO-d}_6$ )  $\delta$  8.40 (t,  $J = 5.59$  Hz, 1H) 7.60 (dd,  $J = 6.7, 2.9$  Hz, 1H), 7.71 – 7.64 (m, 2H), 7.54-7.46 (m, 3H), 6.85 (t,  $J = 5.56$  Hz, 1H), 3.25 (dd,  $J = 12.25, 6.18$  Hz, 2H), 3.08 (dd,  $J = 12.28, 6.19$  Hz, 2H), 2.52 (s, 3H), 1.38 (s, 9H).  $^{13}\text{C-NMR}$  (400 MHz,  $\text{DMSO-d}_6$ )  $\delta$  169.91, 161.99, 160.61, 156.14,

130.43, 129.18 (2C), 128.66, 128.31(2C), 113.35, 78.19, 28.69, 12.26. **LRMS** (DART+) m/z (% intensity): 346 (40, M<sup>+</sup>), 290 (30), 246(100), 229 (13).

## Synthesis of compound 26.

The method of the subsequent deprotection is described in the previous section.

## Synthesis of compound 11.

In a 10 mL round-bottom flask, 272 mg of the compound **26** were placed along with 5 mL of DMF, 196 mg of the compound **13** and 308 mg of K<sub>2</sub>CO<sub>3</sub>. The reaction was stirred for 72 hrs. DMF was evaporated and then the crude product was dissolved in 10 mL of AcOEt, washed twice with 10 mL of water and then with 10 mL of brine. The organic phase was dried over Na<sub>2</sub>SO<sub>4</sub>, filtered and the solvent was removed in a rotary evaporator. The product was purified by silica gel column chromatography with DCM as mobile phase.

Compound **11**: m.p.161-162 °C; **<sup>1</sup>H-NMR** (400 MHz, DMSO-d<sub>6</sub> + CDCl<sub>3</sub>) δ 8.36 (br, 1H) 8.11 (d, *J* = 2.54 Hz, 1H), 8.00 (m, 1H), 7.67 (dd, *J* = 6.89, 2.54 Hz, 2H), 7.46 - 7.37 (m, 3H), 6.81 (d, *J* = 9.23 Hz, 1H), 6.62 (br, 1H), 3.55 (dd, *J* = 11.21, 5.5 Hz, 2H), 3.46 (dd, *J* = 11.01, 5.45 Hz, 2H), 2.54 (s, 3H). **<sup>13</sup>C-NMR** (400 MHz, DMSO-d<sub>6</sub> + CDCl<sub>3</sub>) δ 170.32 (d, *J* = 6.51 Hz), 163.19, 160.3, 149.66, 136.66, 130.12, 128.74 (2C), 128.43, 128.22 (2C), 125.37, 124.97, 117.56, 112.70, 109.14, 43.46, 38.45, 12.31. **LRMS** (DART+) m/z (% intensity): 403 (15, M<sup>+</sup> + 2), 401 (47, M<sup>+</sup>), 333(42), 260 (100).

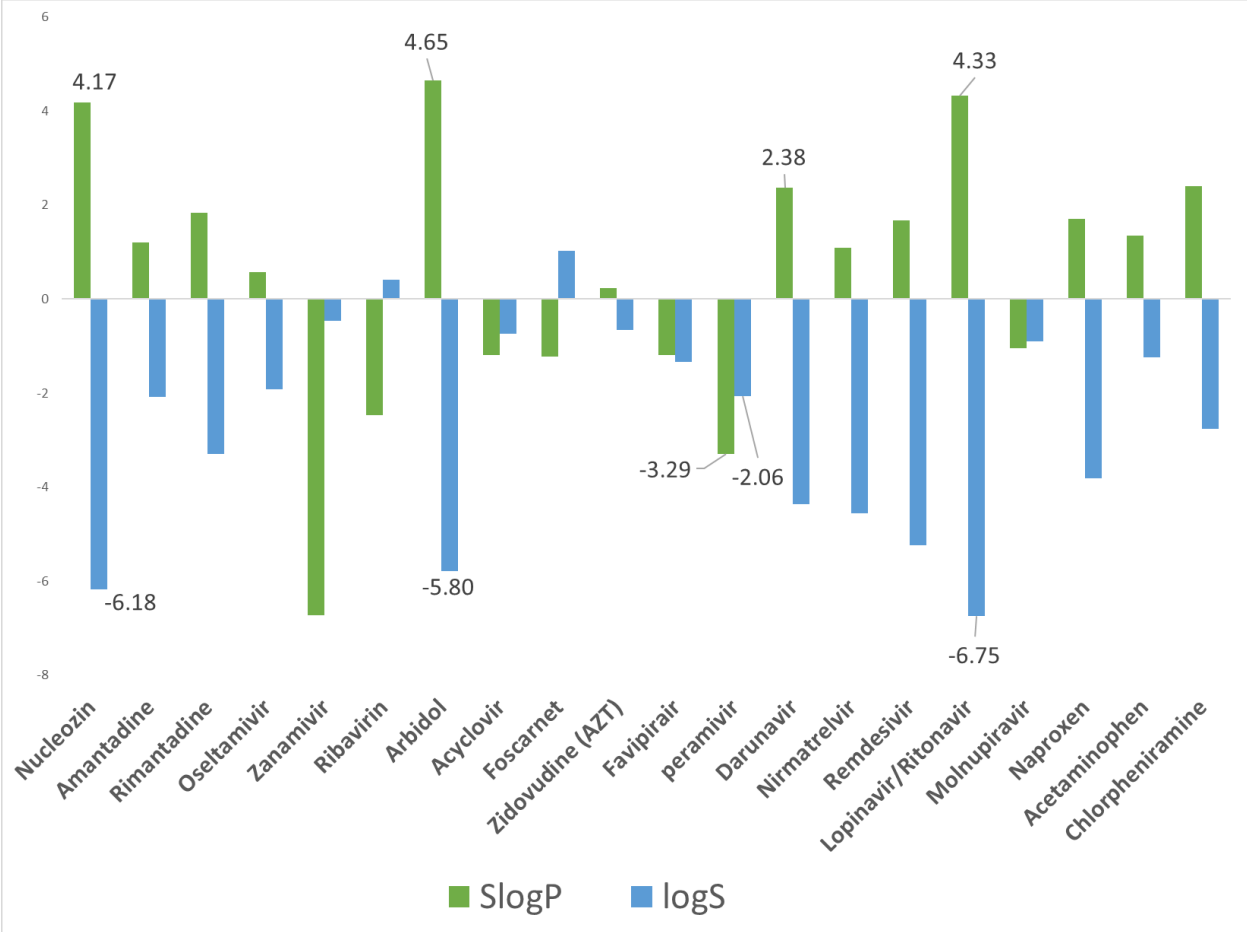

**S1 Figure.** The SlogP and log S calculated for nucleozin, commercial antivirals and other drugs administrated for treatment of influenza infections.

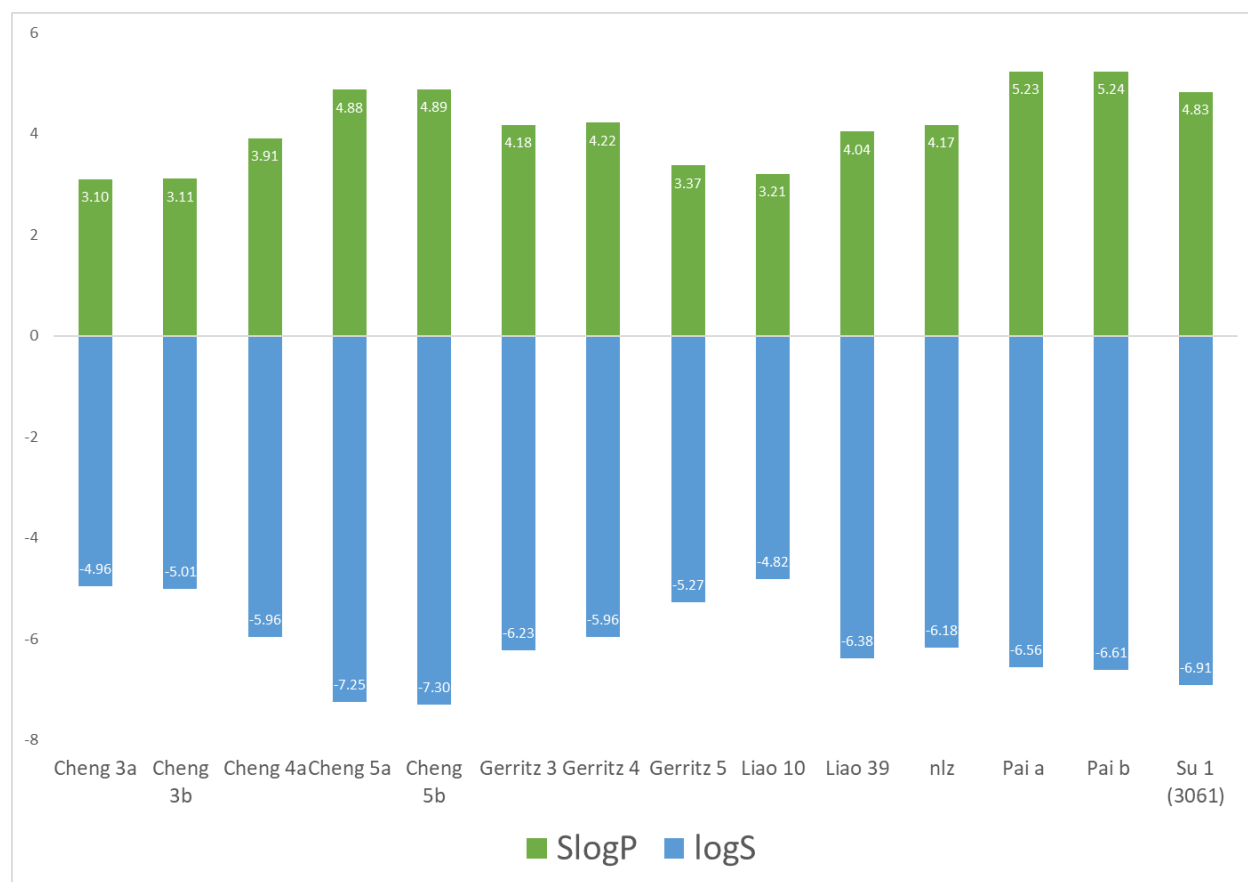

**S2 Figure.** The SlogP and logS calculated for nucleozin analogues. The chemical structures are shown in **S4** and **S5** **Fig.**

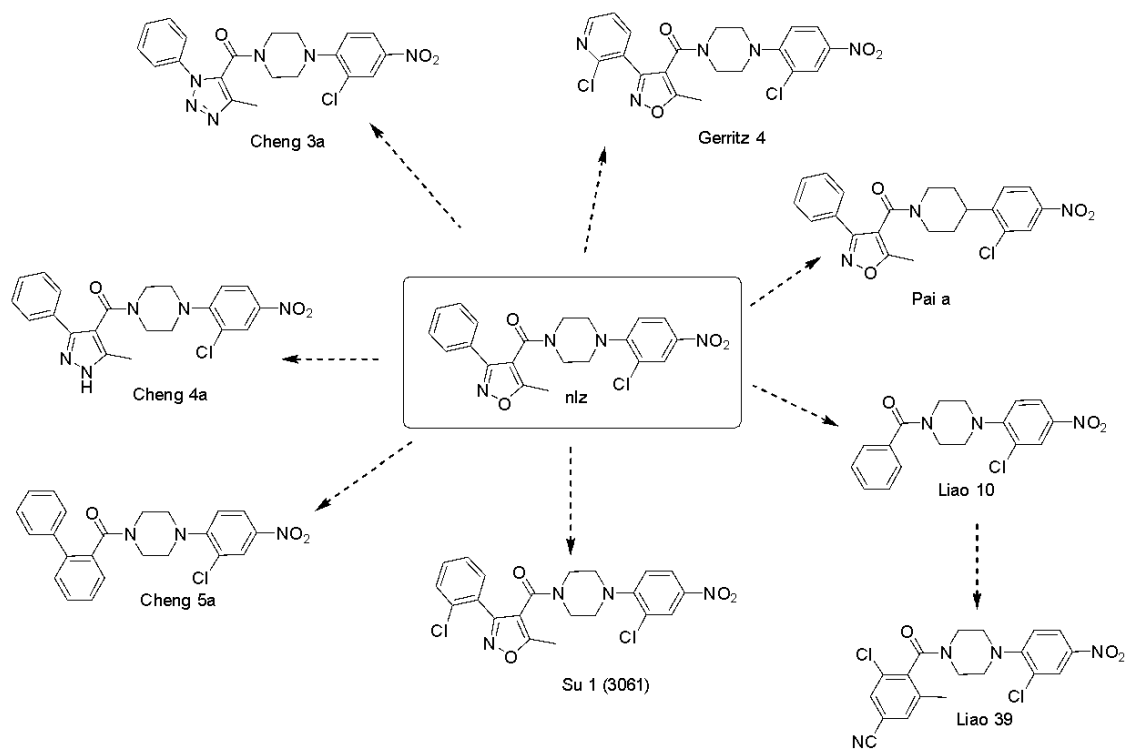

**S3 Figure.** Chemical structures of relevant nucleozin analogues.

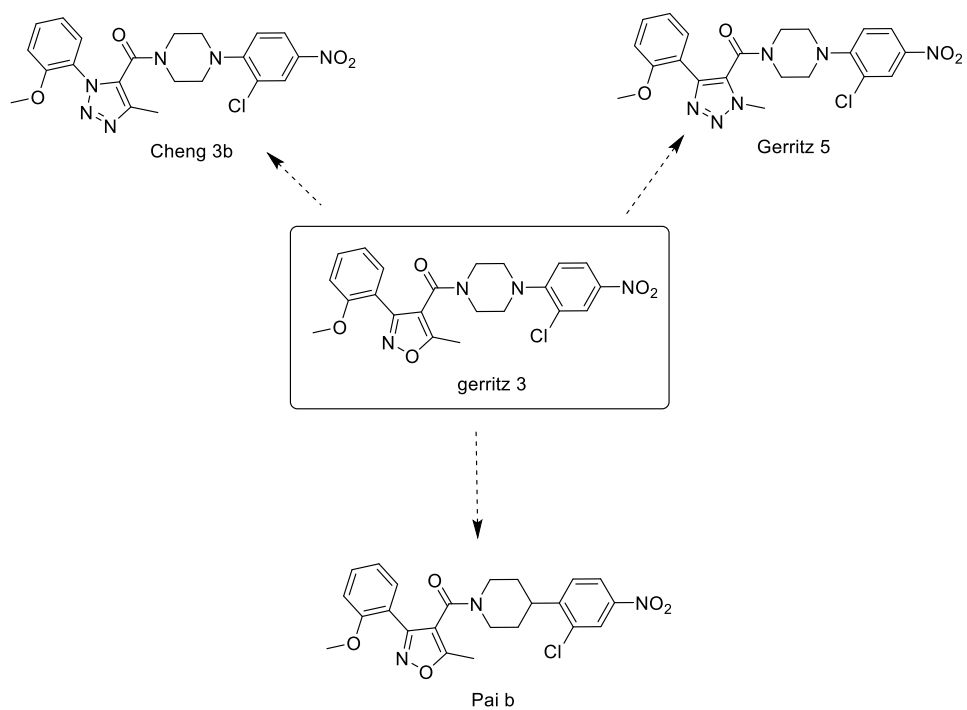

**S4 Figure.** Structural analogues of compound **Gerritz 3**.

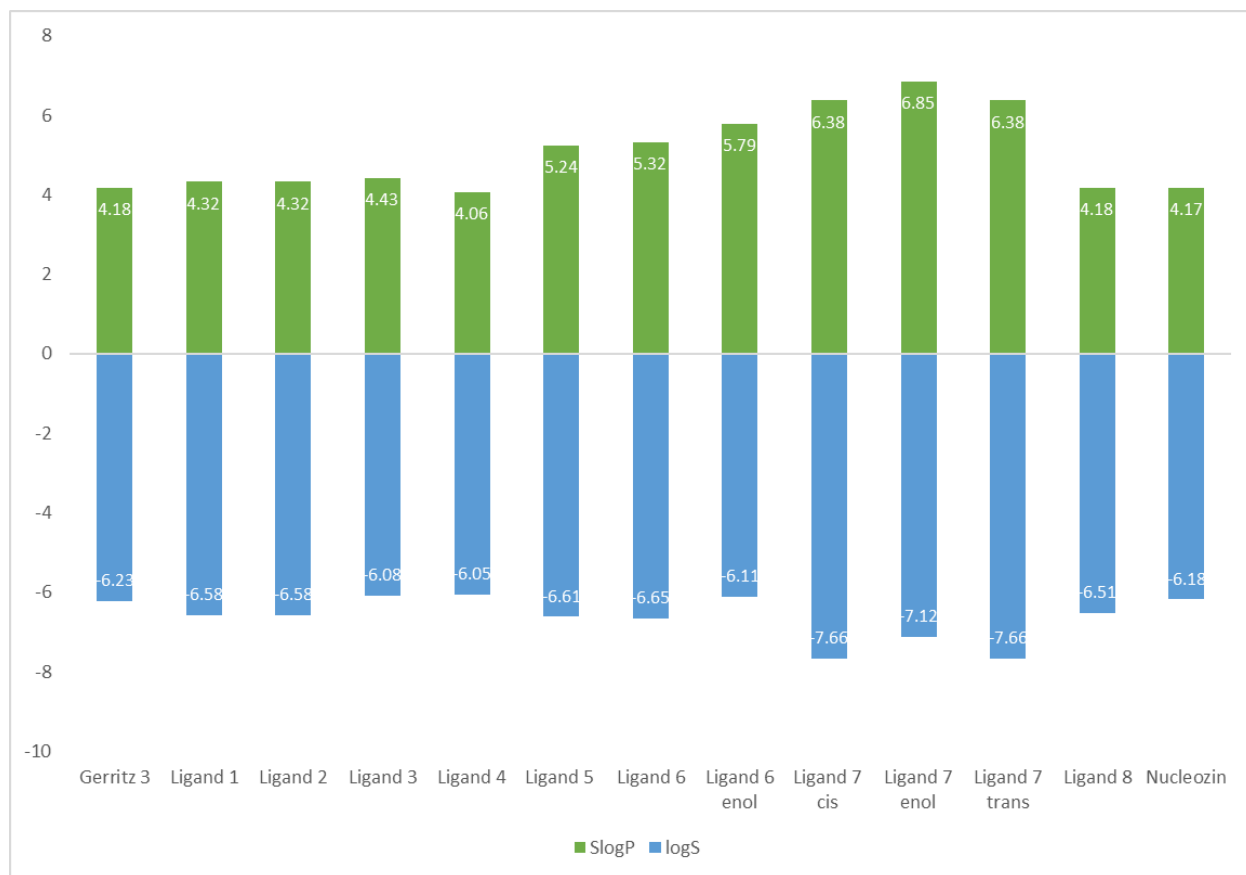

**S5 Figure.** SlogP and logS calculated for the analogues proposed in this work.

## Characterization of nucleozin

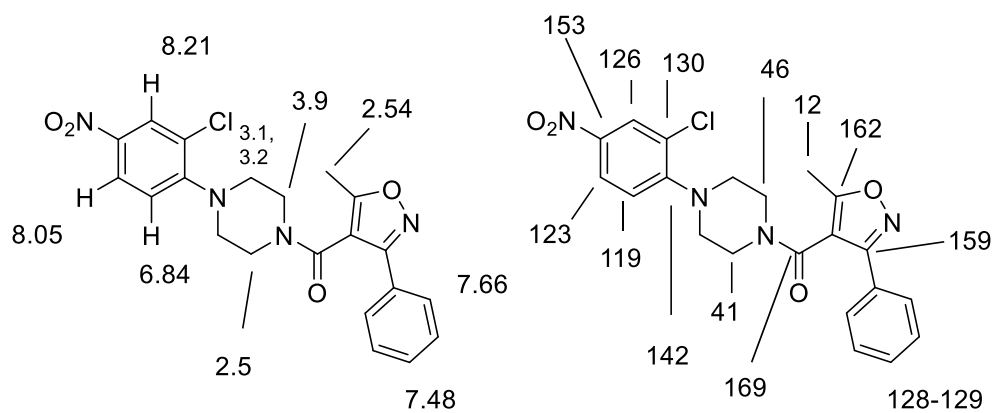

MW = 426.68 g/mol

## <sup>1</sup>H NMR spectrum of nucleozin

HRO  
 UNAM, Instituto de Química (HRíos)  
 Dr-GCuevas\Trojo  
 Clave ECP-370  
 Registro 1024  
 Experimento 1H  
 Disolvente CDCl<sub>3</sub>  
 Bruker300MHZ(I)  
 13-09-2017

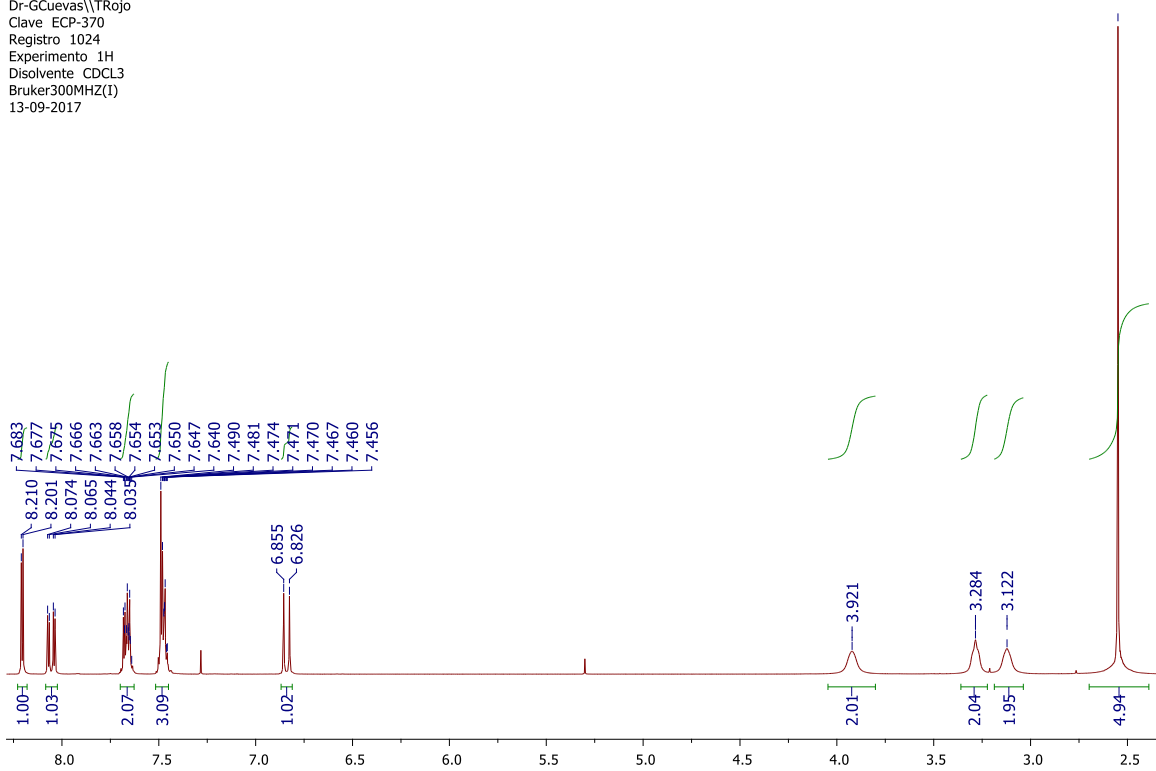

[Escriba aquí]



### $^{13}\text{C}$ NMR spectrum of nucleozin

HRO  
UNAM, Instituto de Quimica (HRios)  
Dr-GCuevas\Trojo  
Clave ECP-370  
Registro 1024  
Experimento 13C  
Disolvente CDCL3  
Bruker300MHZ(I)  
13-09-2017

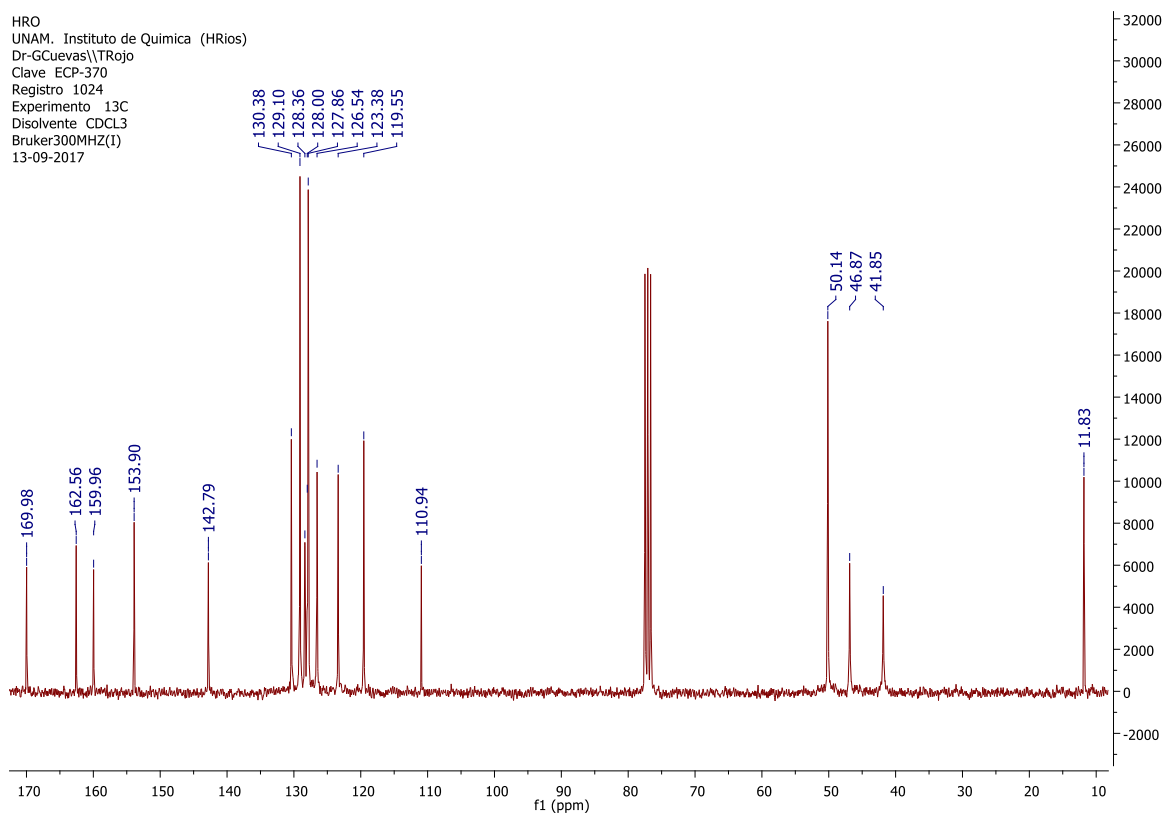

### LR-DART+ Mass spectrum of nucleozin

INSTITUTO DE QUIMICA, UNAM  
LABORATORIO DE LSP-FCI ROMELINIA DEL MABAS

Acq. Date: Name: 3627 ECP 441  
Creation Parameters: Average(MS1) Time: 2.22  
Dr. Cuevas Gabriel/ Operador: Javier Perez

Experiment: Date/Time: 10/25/2022 3:59:09 PM  
Instrument: JUCO\_The AccuTOF 100MS-110JUC  
Ionization Mode: DART+

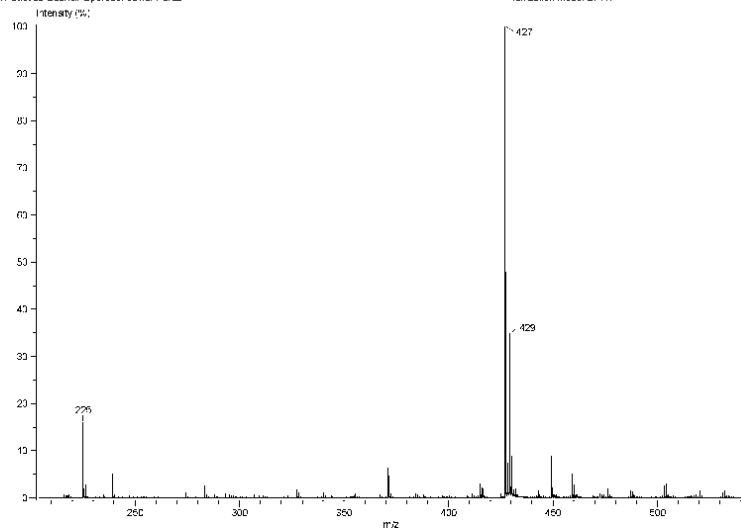

[Escriba aquí]

## Characterization of the compound **20**

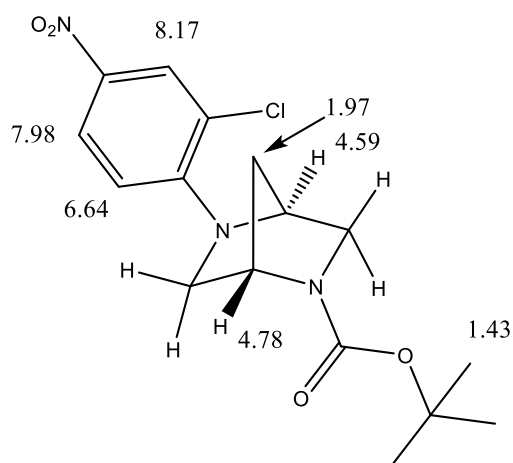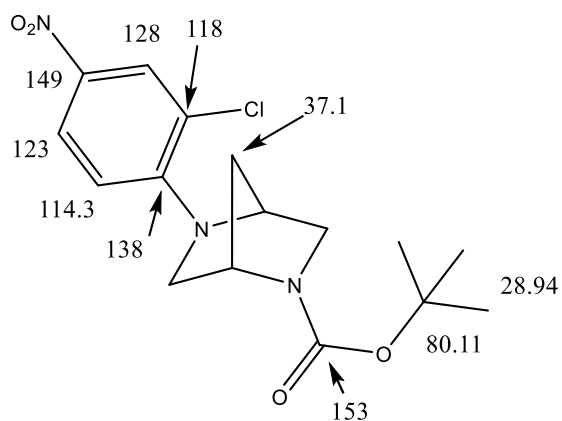

MW= 353.80 g/mol

## <sup>1</sup>H RMN spectra of the compound **20**

<sup>1</sup>H  
 UNAM Instituto de Química ICH  
 Dr. G. Cuevas/ Tania Rojo  
 Clave: ECP-381  
 Disolvente: CDCl<sub>3</sub>  
 Experimento: <sup>1</sup>H  
 Varian Inova 500 MHz (G)  
 No. de Registro 1221  
 11-12-17

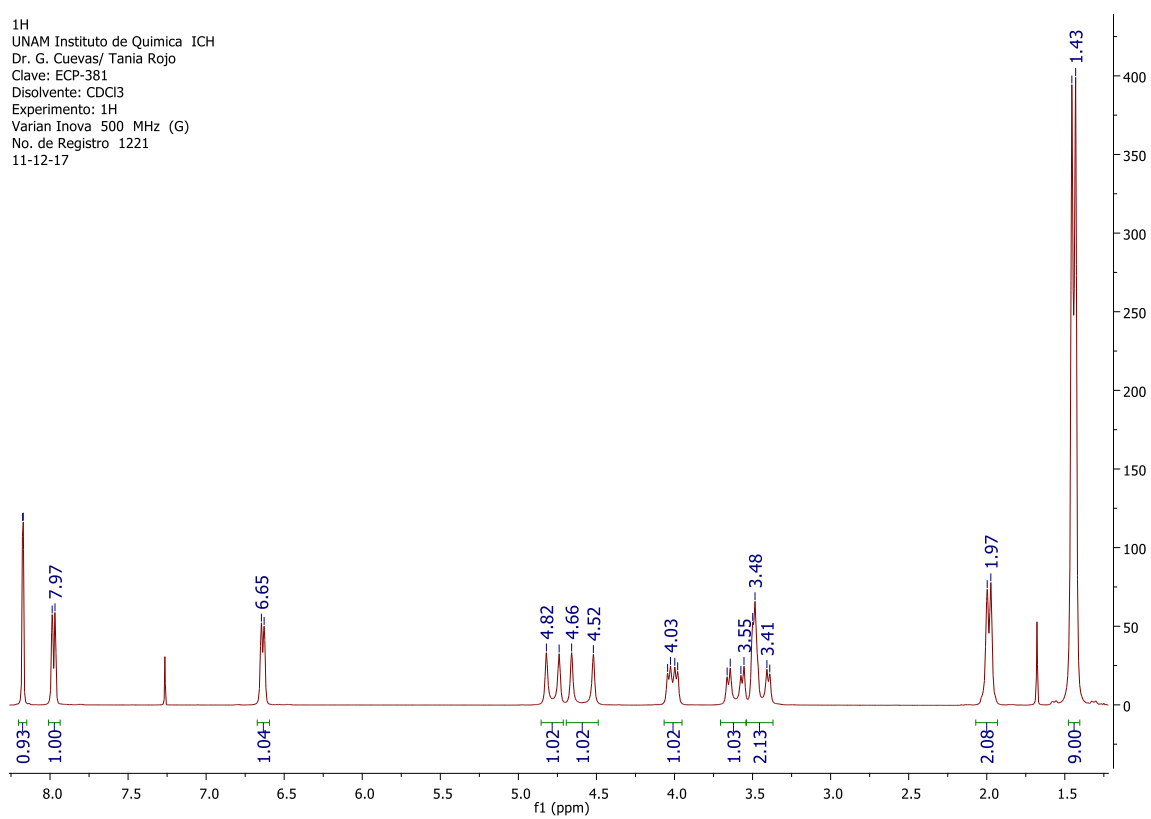

[Escriba aquí]

# <sup>13</sup>C NMR spectrum of compound **20**

<sup>13</sup>C  
UNAM Instituto de Química ICH  
Dr. G. Cuevas/ Tania Rojo  
Clave: ECP-381  
Disolvente: CDCl<sub>3</sub>  
Experimento: 13C  
Varian Inova 125 MHz (G)  
No. de Registro 1221  
11-12-17

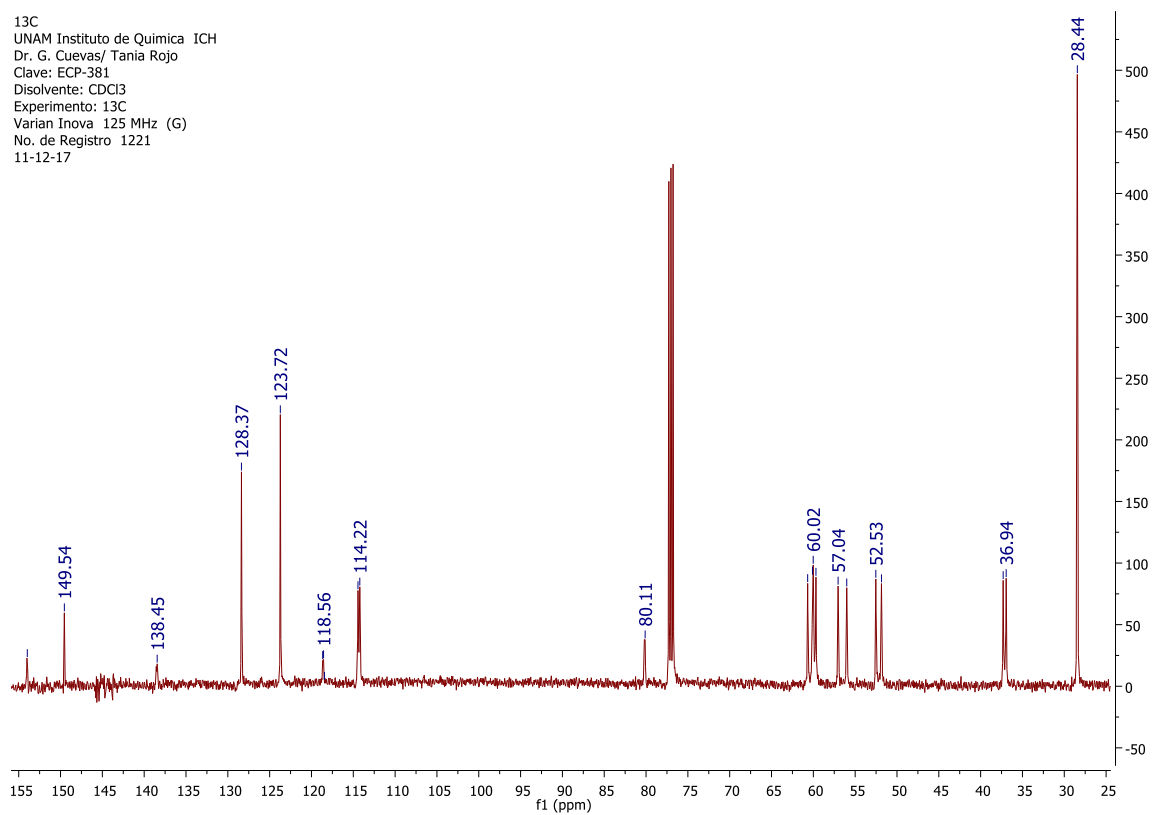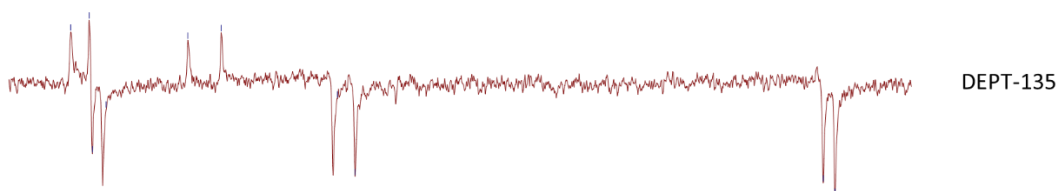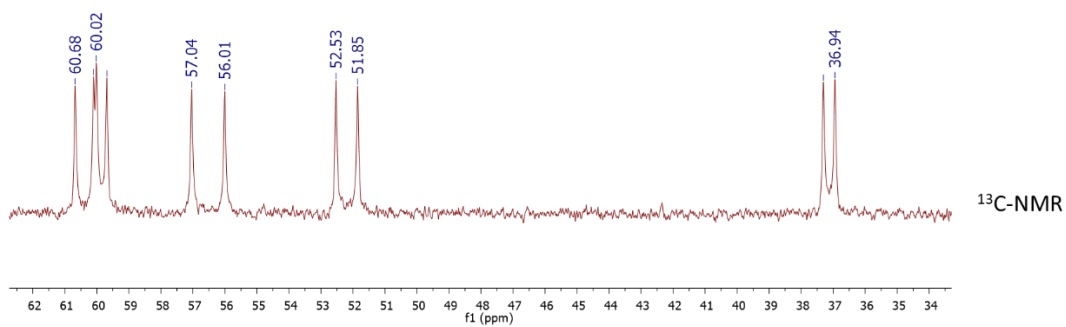

[Escriba aquí]

# LR-Electronic Impact Mass spectrum of compound 20

[ Mass Spectrum ]  
Data : Dr-Cuevas-Gabriel-118 Date : 07-Nov-2017 18:35  
Sample: 2353 ECP-301 Jeol 5X102R  
Note : Operadores javier perez Carmen garcia  
Inlet : Direct Ion Mode : EI+  
Spectrum Type : Normal Ion [MF-Linear]  
RT : 0.99 min Scan# : (19,24)  
BP : m/z 57.0000 Int. : 1232.38  
Output m/z range : 0.0000 to 378.6350 Cut Level : 0.00 %

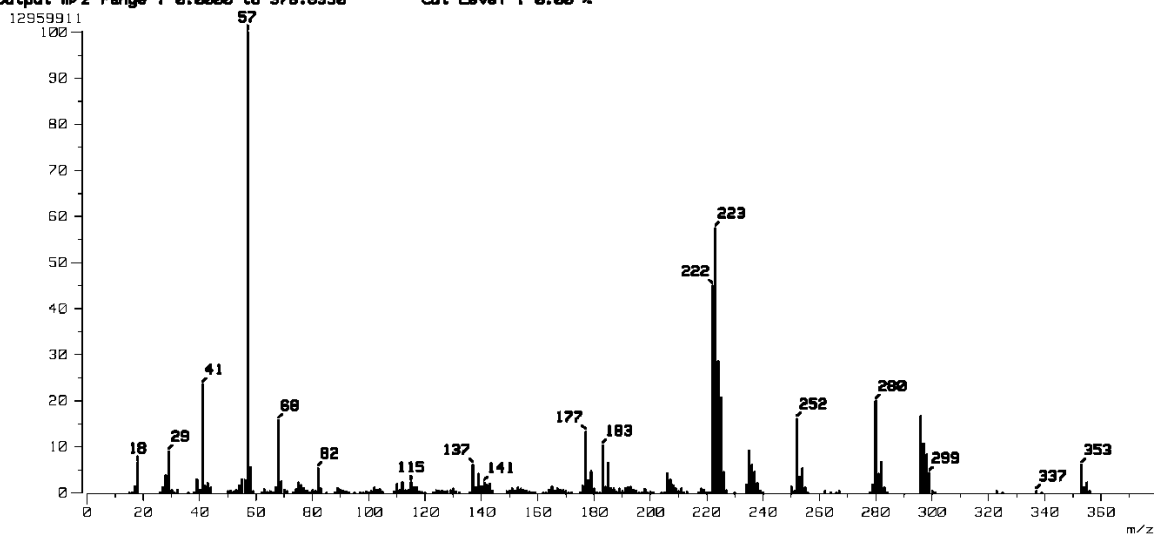

[Escriba aquí]

## Characterization of compound **21**

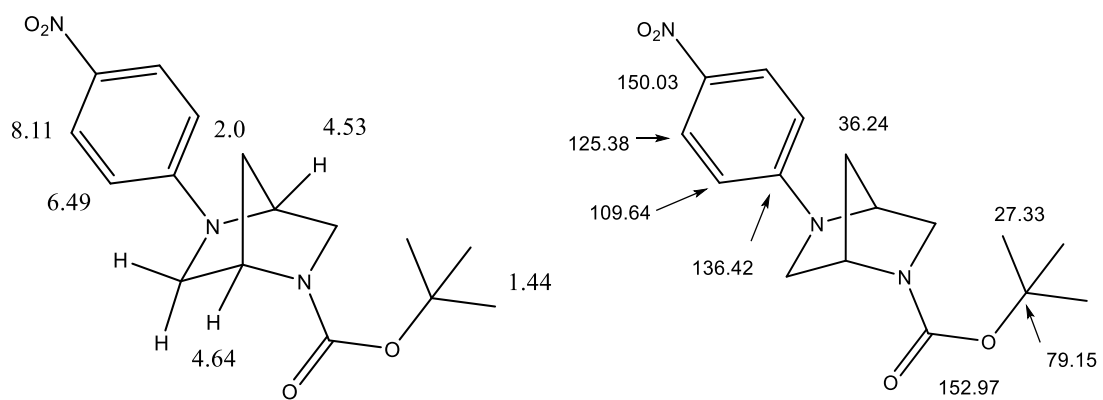

MW = 319.36 g/mol

## <sup>1</sup>H RMN spectra of the compound **21**

<sup>1</sup>H  
UNAM Instituto de Quimica ICH  
Dr. G. Cuevas/ Tania Rojo  
Clave: ECP-384  
Disolvente: CDCl<sub>3</sub>  
Experimento: 1H  
Varian Inova 500 MHz (G)  
No. de Registro 1256  
11-12-17

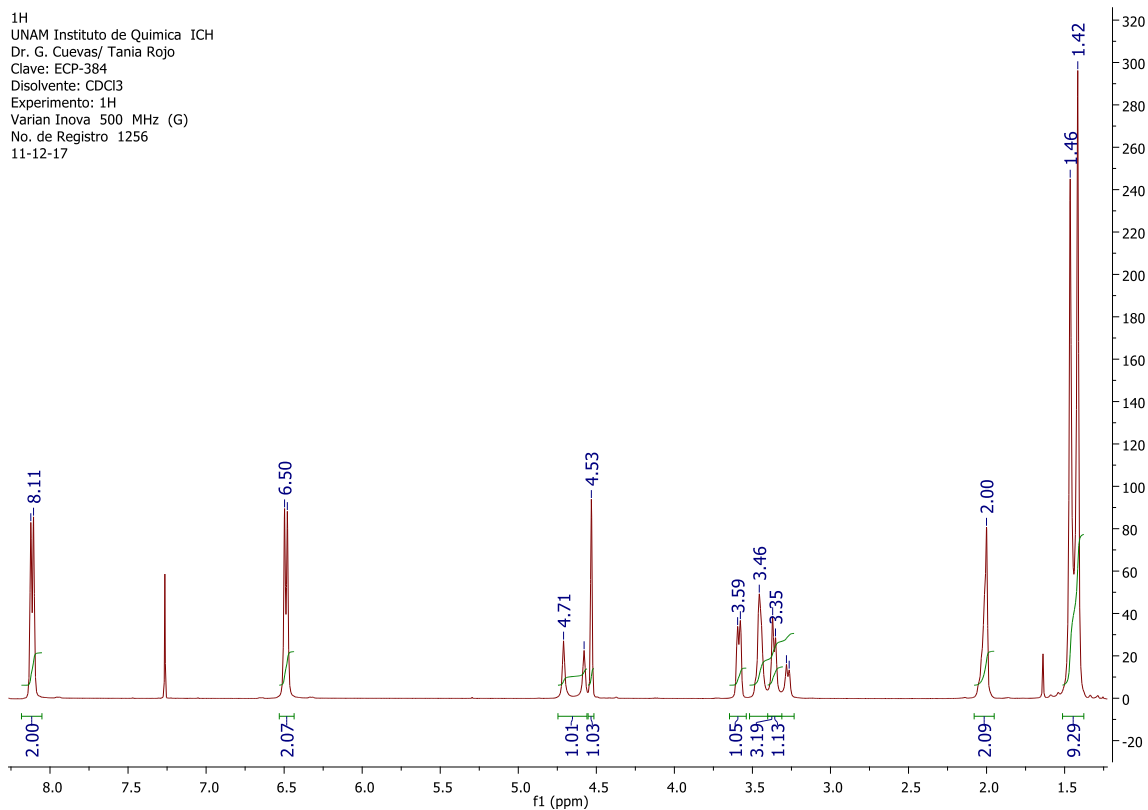

[Escriba aquí]

# <sup>13</sup>C NMR spectrum of compound **21**

<sup>13</sup>C  
UNAM Instituto de Química ICH  
Dr. G. Cuevas/ Tania Rojo  
Clave: ECP-384  
Disolvente: CDCl<sub>3</sub>  
Experimento: 13C  
Varian Inova 125 MHz (G)  
No. de Registro 1256  
11-12-17

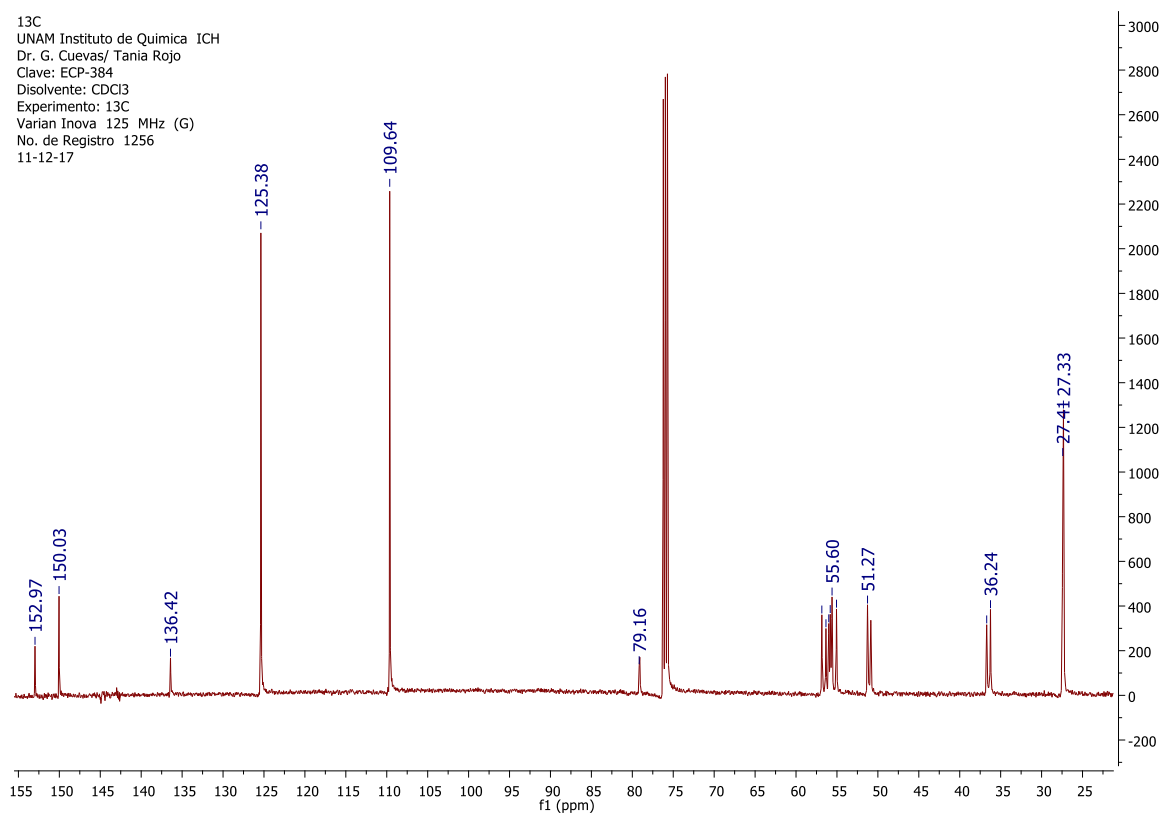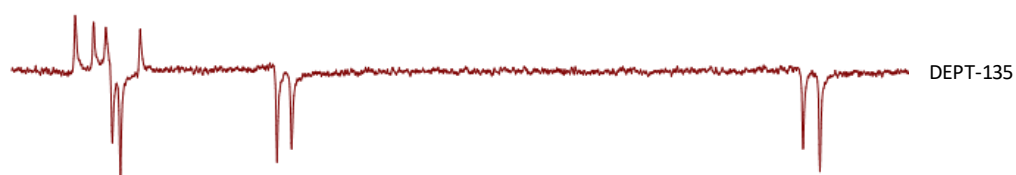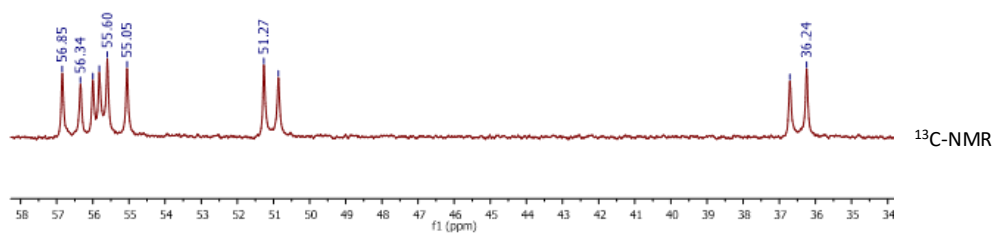

[Escriba aquí]

## Characterization of compound 9

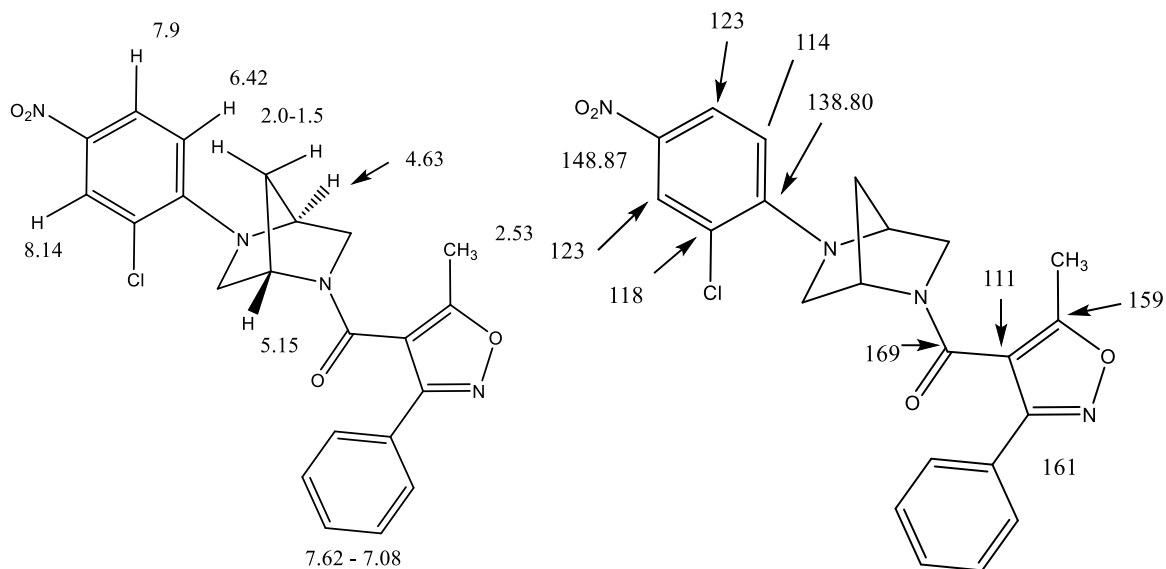

MW = 438.87 g/mol

## $^1\text{H}$ RMN spectra of the compound 9

$^1\text{H}$   
 UNAM Instituto de Química ICH  
 Dr. G. Cuevas/ Tania Rojo  
 Clave: ECP-383  
 Disolvente:  $\text{CDCl}_3$   
 Experimento:  $^1\text{H}$   
 Varian Inova 500 MHz (G)  
 No. de Registro 0064  
 31-01-18

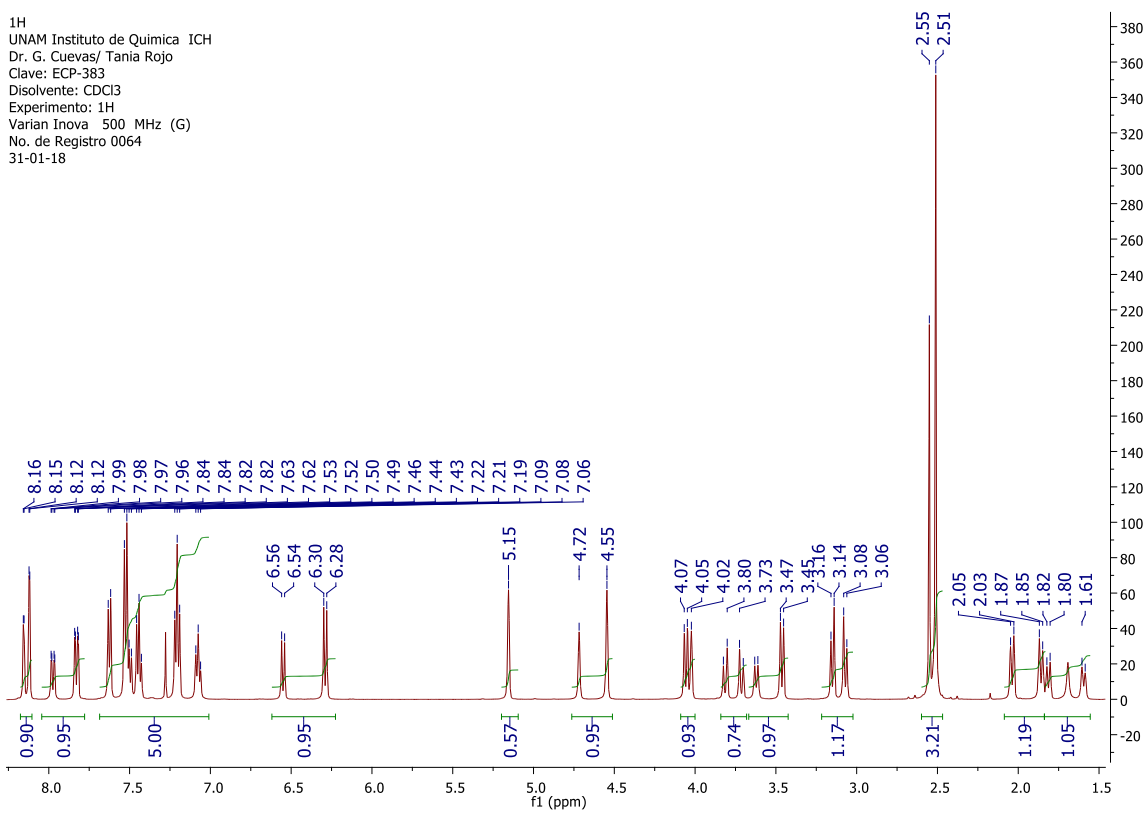

[Escriba aquí]

### $^{13}\text{C}$ NMR spectrum of compound 9

$^{13}\text{C}$   
UNAM Instituto de Química ICH  
Dr. G. Cuevas/ Tania Rojo  
Clave: ECP-383  
Disolvente:  $\text{CDCl}_3$   
Experimento:  $^{13}\text{C}$   
Varian Inova 125 MHz (G)  
No. de Registro 0064  
31-01-18

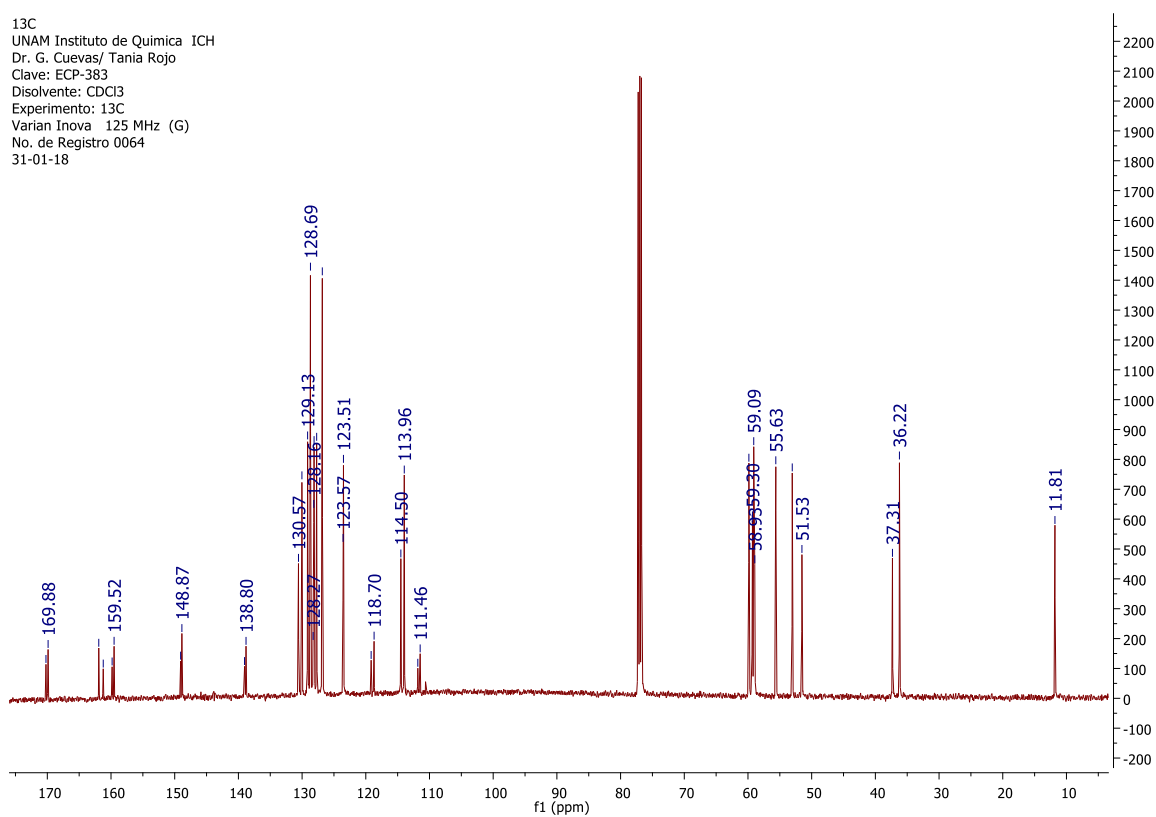

### LR-DART+ Mass spectra of compound 9

INSTITUTO DE QUIMICA, UNAM  
LABORATORIO DE ESPECTROMETRIA DE MASAS

Acq. Data Name: 3628 ECP-383  
Creation Parameters: Average(MS[1] Time: 1.1)  
Dr. Cuevas Gabriel/ Operador Javier Perez

Experiment Date/Time: 10/25/2022 4:03:34 PM  
Instrument: JEOL The AccuTOF JMS-T100LC  
Ionization Mode: DART+

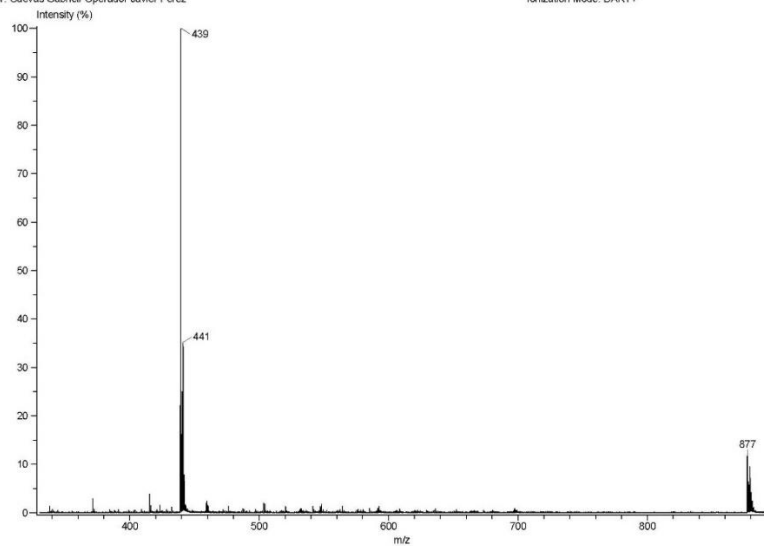

[Escriba aquí]



## Characterization of compound **10**

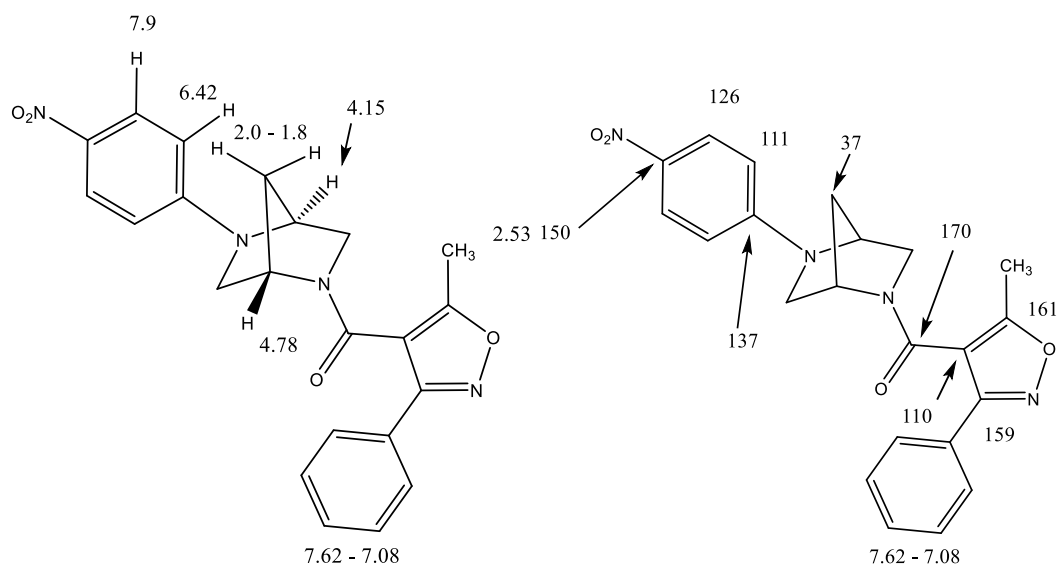

MW = 404.46 g/mol

## $^1\text{H}$ RMN spectra of the compound **10**

$^1\text{H}$   
 UNAM Instituto de Química ICH  
 Dr. G. Cuevas/Tania Rojo  
 Clave: ERP-104  
 Disolvente:  $\text{CDCl}_3$   
 Experimento:  $^1\text{H}$   
 Varian Inova 500 MHz (G)  
 No. de Registro 0065  
 01-02-18

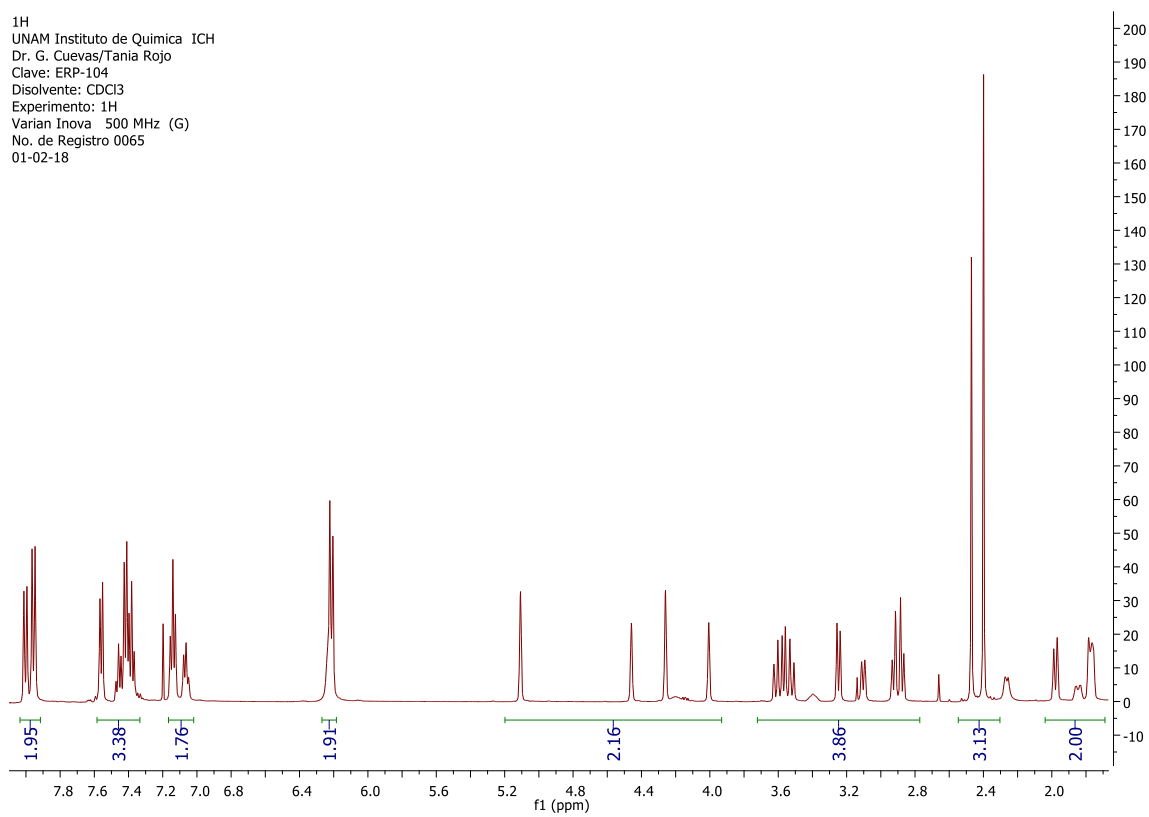

[Escriba aquí]

### <sup>13</sup>C NMR spectrum of compound 10

<sup>13</sup>C  
UNAM Instituto de Química ICH  
Dr. G. Cuevas / Tania Rojo  
Clave: ERP-104  
Disolvente: CDCl<sub>3</sub>  
Experimento: 13C  
Varian Inova 125 MHz (G)  
No. de Registro 0065  
01-02-18

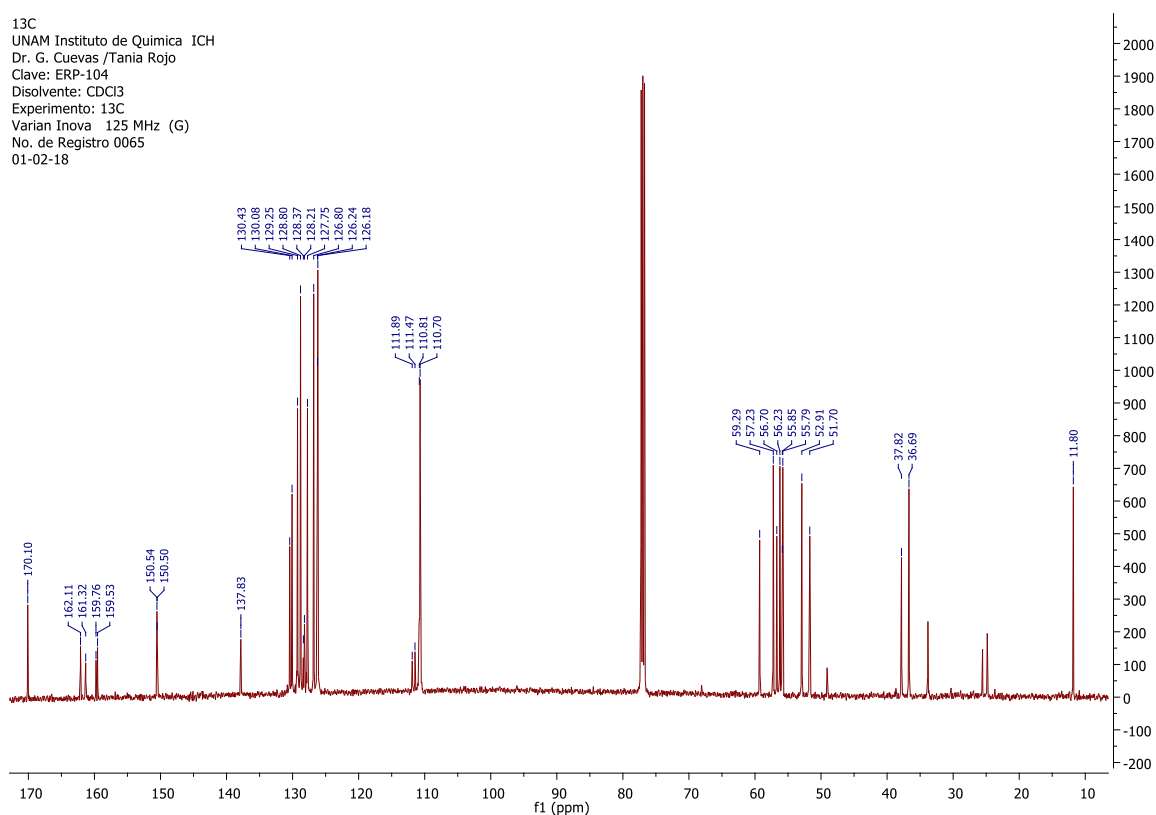

### Electronic Impact Mass spectrum of compound 10

[ Mass Spectrum ]

Data : Dr-Cuevas-Gabriel-056 Date : 30-Jan-2018 19:23

Sample: 135 ERP-104 Jeol SX102F

Nota : Operadores Carmen García Javier Perez

Inlet : Direct Ion Mode : EI+

Spectrum Type : Normal Ion [MF-Linear]

RT : 0.48 min Scan# : (12,18)

BP : m/z 189.0000 Int. : 655.95

Output m/z range : 0.0000 to 467.6558

Cut Level : 0.00 %

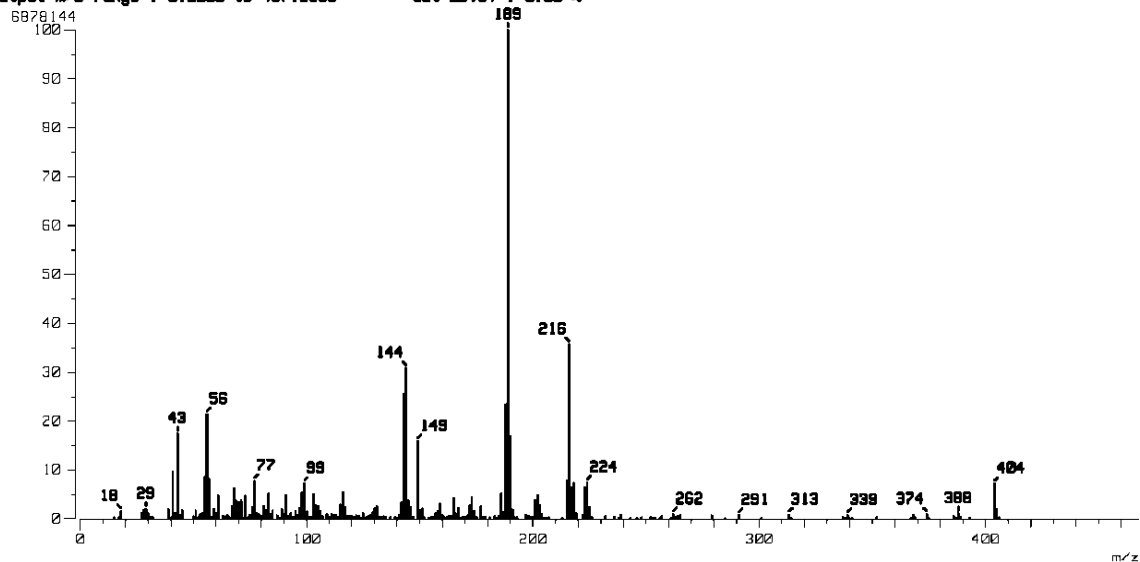

[Escriba aquí]

## Characterization of compound **25**

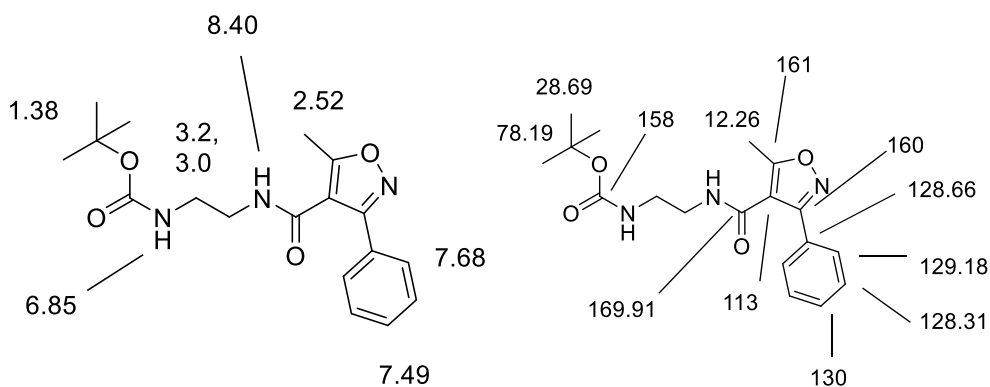

MW = 345.40 g/mol

## $^1\text{H}$ RMN spectra of the compound **25**

12593\_EHuerta\_22  
 Instituto de Química, UNAM / E. Huerta  
 Dr. G. Cuevas / Erick Correa  
 Clave: ECP-1022  
 Disolvente: DMSO-d<sub>6</sub>  
 Hidrogeno-1  
 Bruker Avance III 400 MHz (H)  
 27-10-2022  
 No. de registro: 12593  
 Sonda: BBO 400S1 BBF-H-D-05

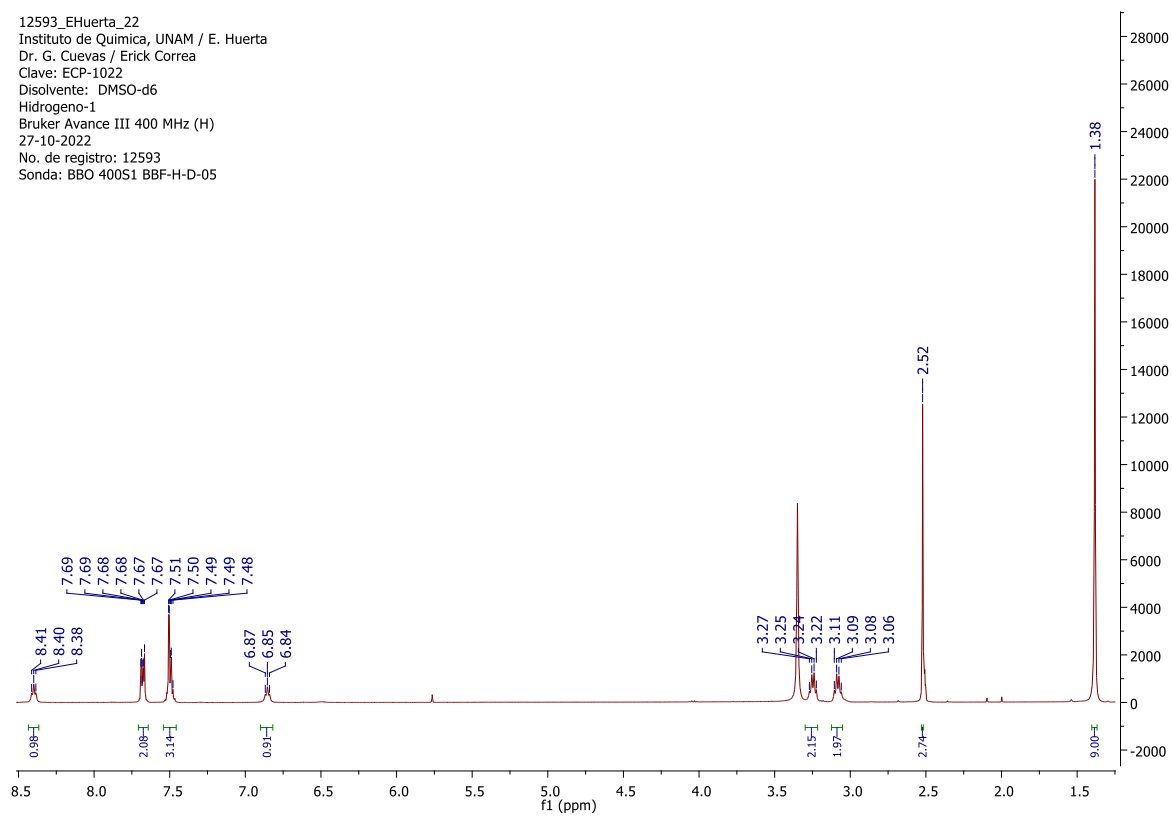

[Escriba aquí]

## $^{13}\text{C}$ NMR spectrum of compound **25**

12593\_EHuerta\_22  
Instituto de Química, UNAM / E. Huerta  
Dr. G. Cuevas / Erick Correa  
Clave: ECP-1022  
Disolvente: DMSO-d<sub>6</sub>  
Carbono-13  
Bruker Avance III 400 MHz (H)  
27-10-2022  
No. de registro: 12593  
Sonda: BBO 400S1 BBF-H-D-05

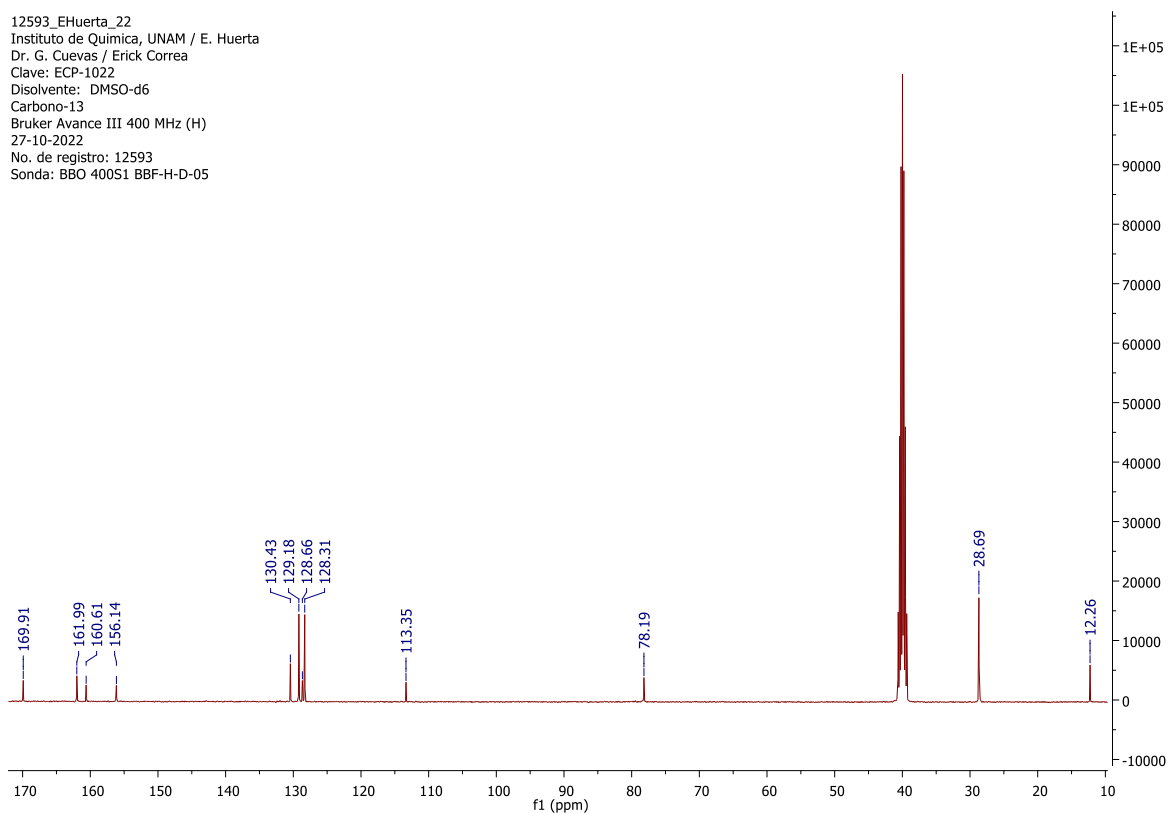

## LR- DART+ Mass spectra of compound **25**

INSTITUTO DE QUÍMICA, UNAM  
LABORATORIO DE ESPECTROMETRÍA DE MASAS

Acq. Data Name: 3630 ECP-1022  
Creation Parameters: Average(MS(1) Time:0.1)  
Dr. Cuevas Gabriel/ Operador Javier Perez

Experiment Date/Time: 10/25/2022 4:11:01 PM  
Instrument: JEOL The AccuTOF JMS-T100LC  
Ionization Mode: DART+

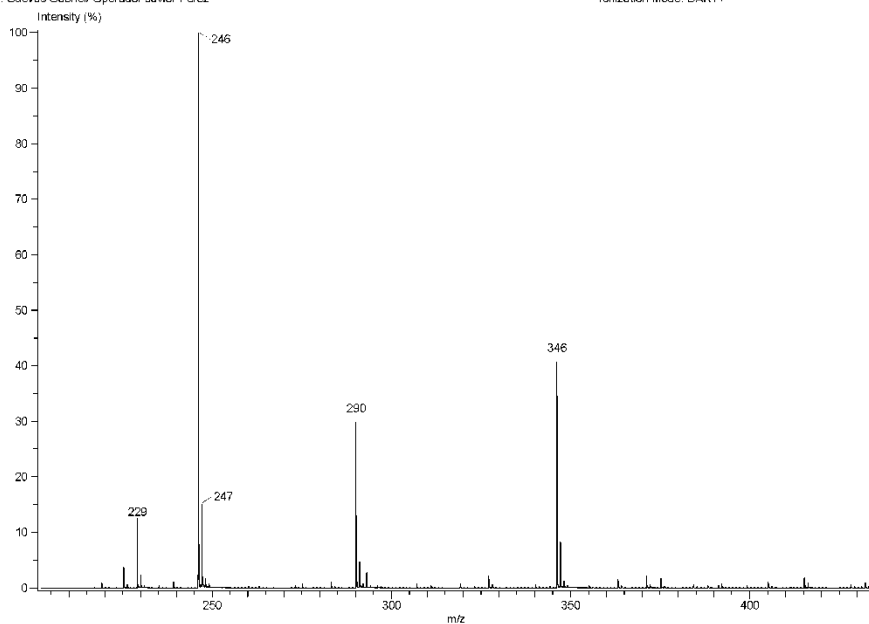

[Escriba aquí]

## Characterization of the compound **11**

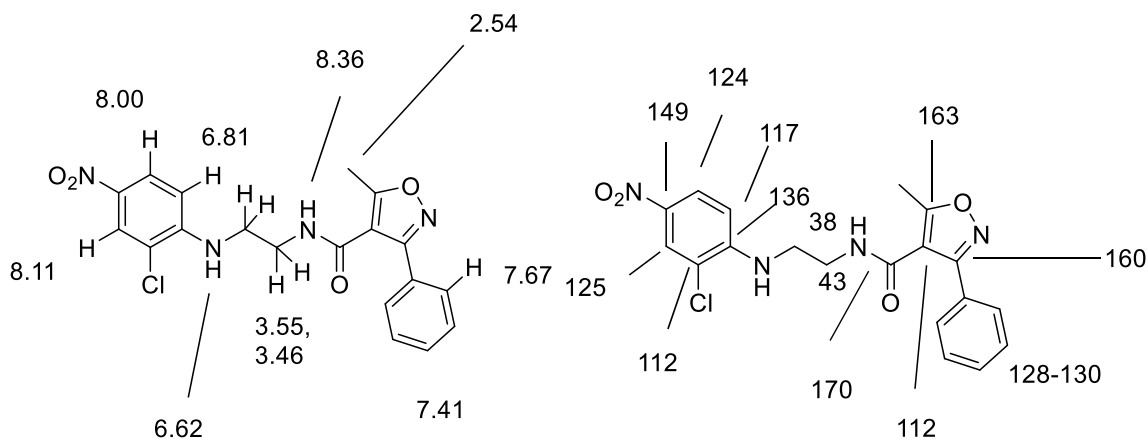

MW = 400.82 g/mol

## $^1\text{H}$ RMN spectra of the compound **11**

12592\_EHuerta\_22  
 Instituto de Química, UNAM / E. Huerta  
 Dr. G. Cuevas / Erick Correa  
 Clave: ECP-1025  
 Disolvente: DMSO-d<sub>6</sub> + CDCl<sub>3</sub>  
 Hidrogeno-1  
 Bruker Avance III 400 MHz (H)  
 31-10-2022  
 No. de registro: 12592  
 Sonda: BBO 400S1 BBF-H-D-05

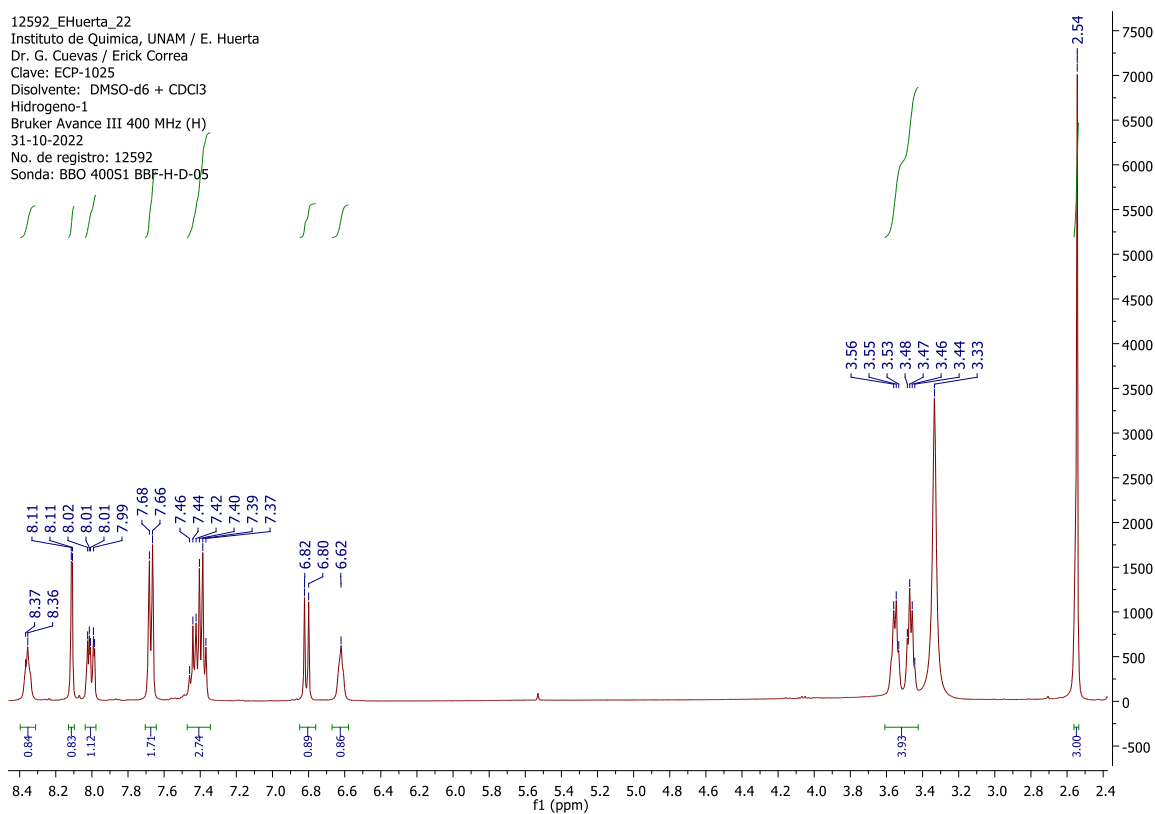

[Escriba aquí]

### <sup>13</sup>C NMR spectrum of the compound **11**

12592\_EHuerta\_22  
Instituto de Química, UNAM / E. Huerta  
Dr. G. Cuevas / Erick Correa  
Clave: ECP-1025  
Disolvente: DMSO-d6 + CDCl3  
Carbono-13  
Bruker Avance III 400 MHz (H)  
27-10-2022  
No. de registro: 12592  
Sonda: BBO 400S1 BBF-H-D-05

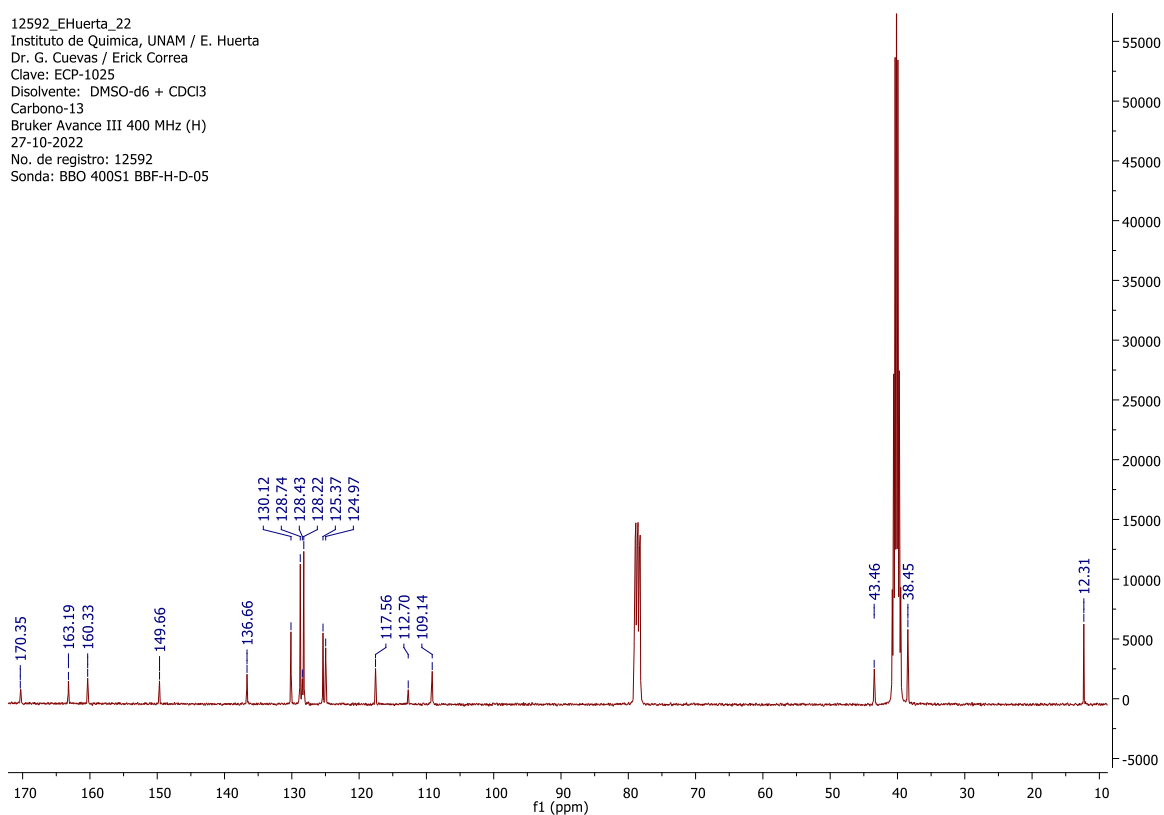

### LR- DART+ Mass spectrum of compound **11**

INSTITUTO DE QUIMICA, UNAM  
LABORATORIO DE ESPECTROMETRIA DE MASAS

Acq. Data Name: 3631\_FCP-1025  
Creation Parameters: Average(MS1) Time 2.33  
Dr. Cuevas Gabriel/ Operador Javier Perez

Experiment Date/Time: 10/25/2022 4:13:50 PM  
Instrument: JEOL The AccuTOF JMS-T100LC  
Ionization Mode: DART+

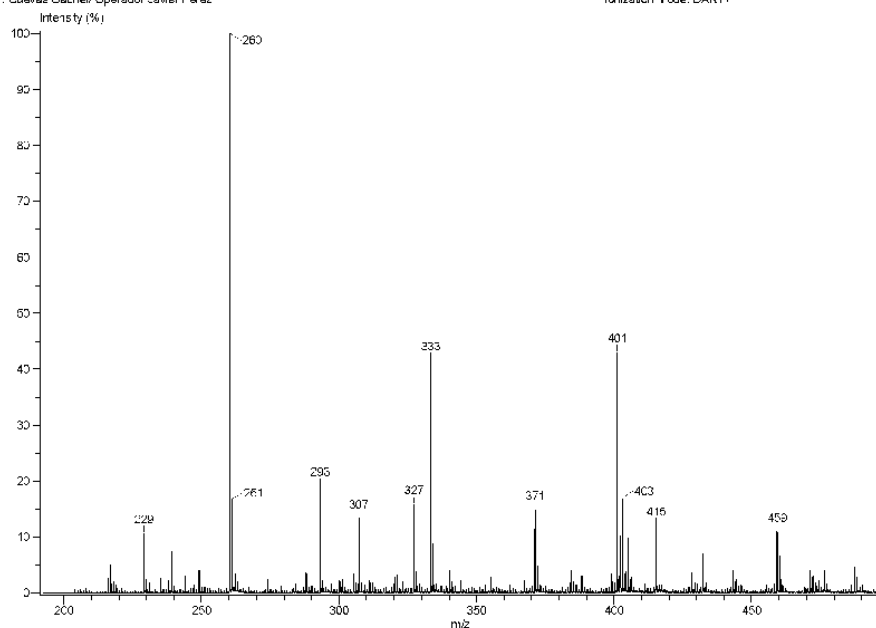

[Escriba aquí]
